# Supplementary material for: The asymmetric synthesis of terminal aziridines by methylene transfer from sulfonium ylides to imines
Source: Royal Society of Chemistry journal article supplement (doi:10.1039/c3ob27271k), 2013-01-01
Supplement: c3ob27271k.pdf [file c3ob27271k.pdf]

## Supplementary Information

### The asymmetric synthesis of terminal aziridines by methylene transfer from sulfonium ylides to imines

Sarah A. Kavanagh, Alessandro Piccinini and Stephen J. Connon\*

Centre for Synthesis and Chemical Biology, School of Chemistry, University of Dublin, Trinity College, Dublin 2, Ireland.

Fax: +353 1 6712826; Tel: +353 1 8961306; E-mail: connon@tcd.ie

#### Table of Contents

|             |                                                                                                                                            |           |
|-------------|--------------------------------------------------------------------------------------------------------------------------------------------|-----------|
| <b>1.0</b>  | <b>General</b>                                                                                                                             | <b>1</b>  |
| <b>2.0</b>  | <b>Synthesis of chiral salt (<i>R,R</i>)-13</b>                                                                                            | <b>2</b>  |
| <b>3.0</b>  | <b>Decomposition products 9, 10 and 11 derived from (<i>R,R</i>)-8</b>                                                                     | <b>3</b>  |
| <b>4.0</b>  | <b>Synthesis of, and characterisation data for imines 1c and 14-20</b>                                                                     | <b>6</b>  |
| <b>5.0</b>  | <b>Catalysis of the aziridination of imines 1a-1e (Table 2): General procedure B</b>                                                       | <b>11</b> |
| 5.1         | Characterisation data for aziridines 3a-3e                                                                                                 | 12        |
| <b>6.0</b>  | <b>Catalysis of the aziridination of imines under optimised conditions (Table 2):<br/>General procedure</b>                                | <b>15</b> |
| 6.1         | Catalysis of the aziridination of imines 1c and 14-20 using ( <i>R,R</i> )-13 under<br>optimised conditions (Table 3): General procedure C | 16        |
| <b>7.0</b>  | <b>Deprotection of aziridine 3c: synthesis of (<i>R</i>)-2-diphenylaziridine for determination<br/>of configuration</b>                    | <b>25</b> |
| <b>8.0</b>  | <b>Proposed mechanism for the decomposition of salt (<i>R,R</i>)-8 to 9</b>                                                                | <b>26</b> |
| <b>9.0</b>  | <b>NMR spectra</b>                                                                                                                         | <b>27</b> |
| <b>10.0</b> | <b>References</b>                                                                                                                          | <b>36</b> |

## 1.0 General

Proton Nuclear Magnetic Resonance spectra were recorded on a Bruker Avance 400 or 600 MHz spectrometer in CDCl<sub>3</sub> referenced relative to residual CHCl<sub>3</sub> ( $\delta = 7.26$  ppm) or DMSO-d<sub>6</sub> referenced relative to residual DMSO-d<sub>6</sub> ( $\delta = 2.50$  ppm). Chemical shifts are reported in ppm and coupling constants in Hertz. Carbon NMR spectra were recorded on the same instruments (100 or 150 MHz) with total proton decoupling. All melting points are uncorrected. Infrared spectra were obtained on a Perkin Elmer Spectrum One spectrophotometer. Flash chromatography was carried out using silica gel, particle size 0.04-0.063 mm. TLC analysis was performed on precoated 60F<sub>254</sub> slides, and visualised by UV irradiation, KMnO<sub>4</sub>, phosphomolybdic acid, or anisaldehyde staining. Specific rotation measurements were made on a Rudolph research analytical Autopol IV instrument, and are quoted in units of 10<sup>-1</sup>degcm<sup>2</sup>g<sup>-1</sup>. Anhydrous THF was distilled over sodium-benzophenone ketyl radical before use. Methylene chloride, toluene and triethylamine were distilled from calcium hydride. All reactions were carried out under a protective argon atmosphere. Analytical CSP-HPLC was performed on Daicel CHIRALCEL OJ-H (4.6 mm x 25 cm) and CHIRALPAK AD-H (4.6 mm x 25 cm). Solid reagents for all catalysed reactions were weighed using a Precisa balance, series 320XR, model XR125SM-FR (readability 0.01 mg/0.1 mg). For all known compounds the spectral characteristics were in agreement with those reported in the literature. (2*R*,5*R*)-2,5-Diisopropyl-thiolane was prepared according to a literature procedure.<sup>1</sup> Imines *N*-benzylidene-4-methoxybenzenamine (**1b**)<sup>2</sup>, *N*-(benzylidene)-4-methylbenzenesulfonamide (**1a**)<sup>3</sup>, *P,P*-diphenyl-*N*-(phenylmethylene)phosphinic amide (**1e**)<sup>4</sup> and *N*-Phenyl benzaldehyde imine (**1d**)<sup>5</sup> were prepared according to literature procedures. The spectroscopic data of the aforementioned compounds were consistent with those previously reported.

## 2.0 Synthesis of chiral salt (*R,R*)-13

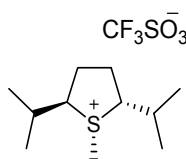

A 5 cm<sup>3</sup> oven dried round bottomed flask was charged with (2*R*,5*R*)-2,5-diisopropyl-thiolane<sup>1</sup> (17 mg, 0.09 mmol). The flask was fitted with a septum and placed under an atmosphere of argon (balloon) when CH<sub>2</sub>Cl<sub>2</sub> (0.5 cm<sup>3</sup>, 0.2 M) and methyl triflate (10.8  $\mu$ L, 0.099 mmol) were added sequentially *via* syringe. The resulting solution was allowed to stir at room temperature for 1.5 h. The solvent was removed *in vacuo* and the resulting sulfonium salt (***R,R***-13) was obtained as a yellow tacky solid in quantitative yield.  $[\alpha]_D^{20} = -168.3$  (c 0.3, CH<sub>2</sub>Cl<sub>2</sub>).

$\delta_{\text{H}}$  (600 MHz,  $\text{CDCl}_3$ ): 1.12 (d, J 6.4, 3H), 1.16-1.18 (m, 9H), 1.87 (ddd, J 5.5, 12.3, 27.3, 1H), 2.10 (m, 1H), 2.21 (qd, J 6.8, 7.1, 1H), 2.45 (ddd, J 5.5, 13.2, 27.6, 1H), 2.56 (m, 1H), 2.73 (m, 1H), 2.91 (s, 3H), 3.42 (m, 1H), 4.26 (m, 1H).

$\delta_{\text{C}}$  (150 MHz,  $\text{CDCl}_3$ ): 19.8, 20.3, 20.9, 21.1, 22.9, 28.2, 31.7, 32.8, 32.9, 68.5, 75.1.

$\delta_{\text{F}}$  (376 MHz,  $\text{CDCl}_3$ ): -78.9 (s, 3F).

$\nu$  ( $\text{cm}^{-1}$ ): 755, 841, 952, 968, 1027, 1158, 1224, 1260, 1371, 1389, 1425, 1449, 1471, 2877, 2961.

HRMS (ESI):  $[\text{M}]^+$  Calcd. for  $\text{C}_{11}\text{H}_{23}\text{S}$  187.1520; found 187.1517.

### 3.0 Decomposition products derived from (*R,R*)-8

#### Decomposition product 9

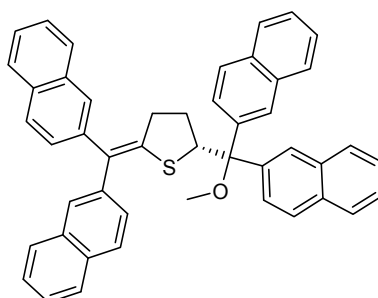

Was obtained as a yellow solid. M.p. 109-110 °C.

$\delta_{\text{H}}$  (600 MHz,  $\text{CDCl}_3$ ): 2.04-2.13 (m, 2H), 2.32-2.37 (m, 1H), 2.55-2.59 (m, 1H), 3.15 (s, 3H), 4.98-5.06 (m, 1H), 6.90 (d, J 7.7, 1H), 7.14 (s, 1H), 7.29 (d, J 9.7, 1H), 7.35 (d, J 8.8, 1H), 7.37-7.60 (m, 11H), 7.69-7.85 (m, 9H), 7.91 (d, J 7.9, 1H), 7.95 (d, J 7.9, 1H), 8.03 (s, 1H), 8.12 (s, 1H).

$\delta_{\text{C}}$  (150 MHz,  $\text{CDCl}_3$ ): 31.4, 35.7, 51.7, 55.1, 85.6 (q), 125.6, 125.7, 125.80, 125.82, 126.0, 126.1, 126.37, 126.39, 126.8, 127.2, 127.3, 127.4 (2xC), 127.45, 127.51, 127.56,

127.64 (2xC), 127.7, 127.79, 127.84, 128.0, 128.1, 128.2, 128.3, 128.4, 128.62, 128.63 (C+C(q)), 131.9 (q), 132.3 (q), 132.49 (q), 132.54 (q), 132.77 (q), 132.80 (q), 133.1 (q), 133.3 (q), 138.4 (q), 139.1 (q), 139.9 (q), 140.5 (q), 143.0 (q).

$\nu$  (cm<sup>-1</sup>): 745, 799, 819, 856, 1073, 1124, 1504, 1597, 2854, 2925, 3053.

HRMS (ESI): [M+Na]<sup>+</sup> Calcd. for C<sub>47</sub>H<sub>36</sub>OSNa 671.2385; found 671.2370.

### Decomposition product 10

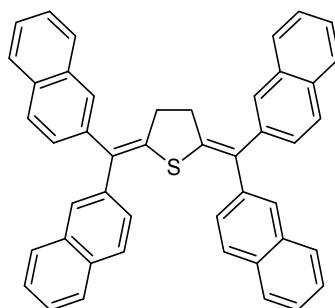

Was obtained as an orange solid. M.p. 253-255 °C.

$\delta_{\text{H}}$  (600 MHz, CDCl<sub>3</sub>): 3.07 (s, 4H), 7.29-7.31 (m, 2H), 7.39-7.47 (m, 10H), 7.71-7.82 (m, 16H).

$\delta_{\text{C}}$  (100 MHz, CDCl<sub>3</sub>): 36.4, 126.18, 126.22 (2xC), 126.5, 127.87, 127.93 (2xC), 128.0, 128.1, 128.2 (2xC), 128.4, 128.6, 128.8, 131.2 (q), 132.5 (q), 132.7 (q), 133.5 (q), 133.6 (q), 139.9 (q), 140.2 (q), 141.7 (q).

$\nu$  (cm<sup>-1</sup>): 745, 799, 819, 856, 1073, 1124, 1504, 1597, 2854, 2925, 3053.

HRMS (MALDI): [M]<sup>+</sup> Calcd. for C<sub>46</sub>H<sub>32</sub>S 616.2225; found 616.2199.

## Decomposition product 11

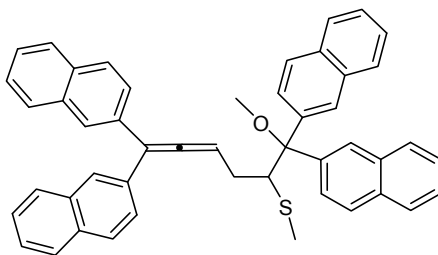

Was obtained as a yellow solid. M.p. 133-134 °C.

$\delta_{\text{H}}$  (600 MHz,  $\text{CDCl}_3$ ): 1.87 (s, 3H), 2.09-2.14 (m, 1H), 3.08 (s, 3H), 3.15-3.19 (m, 1H), 4.02 (dd, J 1.7, 11.0, 1H), 6.04 (t, J 6.9, 1H), 7.287.33 (m, 1H), 7.46-7.92 (m, 25H, H-Ar), 8.05 (s, 2H).

$\delta_{\text{C}}$  (150 MHz,  $\text{CDCl}_3$ ): 14.09, 31.7, 51.8, 53.6, 87.2 (q), 92.9, 110.6 (q), 125.88, 125.93 (2xCH), 125.99, 126.1, 126.17, 126.25, 126.27, 126.89, 126.92, 127.1(2xCH), 127.23, 127.24, 127.27 (2xCH), 127.34, 127.4, 127.60, 127.64, 127.92, 127.98, 127.99, 128.02, 128.3, 128.49, 128.53, 128.7, 132.49 (q), 132.53 (q), 132.6 (q), 132.67 (q), 132.71 (2xq), 133.48 (q), 133.52 (q), 134.3 (q), 134.4 (q), 137.7 (q), 137.9 (q), 206.9 ((q) allene),

$\nu$  ( $\text{cm}^{-1}$ ): 744, 818, 951, 1125, 1504, 1596, 2854, 2923, 3054, 3338.

HRMS (ESI):  $[\text{M}+\text{Na}]^+$  Calcd. for  $\text{C}_{48}\text{H}_{38}\text{OSNa}$  685.2541; found 685.2542.

## 4.0 Synthesis of imines 1c and 14-20

### 2,4,6-Triisopropylbenzenesulfonamide

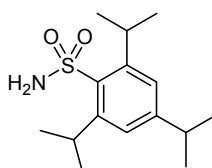

A 100 cm<sup>3</sup> round bottomed flask containing a stirring bar was charged with 2,4,6-triisopropylbenzenesulfonyl chloride (6.057 g, 20.00 mmol) followed by CHCl<sub>3</sub> (30 cm<sup>3</sup>, 0.66 M). The solution was then treated with NH<sub>3</sub>(aq) (5.5 cm<sup>3</sup>, 100 mmol, 28% solution) and allowed to stir at room temperature for 2 h. The reaction mixture was transferred to a separating funnel and extracted with CHCl<sub>3</sub> (3 x 30 cm<sup>3</sup>). The organic layer was dried over MgSO<sub>4</sub> and concentrated under reduced pressure. The crude product was placed on a frit, washed with hexane and dried by suction filtration to afford 2,4,6-triisopropylbenzenesulfonamide (5.385 g, 95%) as a white solid. M.p. 130-131 °C (lit<sup>6</sup> 118.5-119.5 °C). The NMR spectrum was consistent with those previously reported.<sup>7</sup>

$\delta_{\text{H}}$  (400 MHz, CDCl<sub>3</sub>): 1.25 (d, J 6.8, 6H), 1.29 (d, J 6.8, 12H), 2.90 (septet, J 6.9, 1H), 4.11 (septet, J 6.7, 2H), 4.80 (br s, 2H, NH), 7.17 (s, 2H).

### General procedure A: synthesis of imines (1c and 14-20)

An oven dried round bottomed flask was charged with 2,4,6-triisopropylbenzenesulfonamide (1 equiv.), fitted with a septum and placed under an atmosphere of argon (balloon). CH<sub>2</sub>Cl<sub>2</sub> was then added *via* syringe followed by triethylamine (3 equiv.) and the appropriate aldehyde (1 equiv.). The resulting solution was cooled to 0 °C. Titanium(IV) chloride (0.5 equiv.) in CH<sub>2</sub>Cl<sub>2</sub> was then added dropwise to the cooled solution and the resulting solution was allowed to stir for 1 h at this temperature. The reaction mixture was filtered through Celite and washed with CH<sub>2</sub>Cl<sub>2</sub>. The filtrate was concentrated *in vacuo* and the resulting solid was suspended in toluene and then filtered. The filtrate was then concentrated under reduced pressure to afford the desired imine which was purified as required.

### *N*-Phenylmethylidene-2,4,6-triisopropylbenzenesulfonamide (1c)

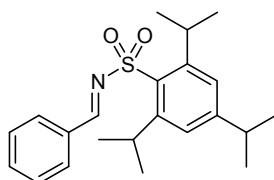

Prepared according to general procedure A using 2,4,6-triisopropylbenzenesulfonamide (1 g, 3.528 mmol), triethylamine (1.50 cm<sup>3</sup>, 10.6 mmol), benzaldehyde (357  $\mu$ L, 3.53 mmol), CH<sub>2</sub>Cl<sub>2</sub> (7.0 cm<sup>3</sup>) and titanium(IV) chloride (195  $\mu$ L, 1.76 mmol) in CH<sub>2</sub>Cl<sub>2</sub> (2 cm<sup>3</sup>). The product **1c** was obtained as an off white solid (976 mg,

74%). M.p. 128-129 °C (lit.<sup>8</sup>128-130 °C). The NMR spectrum of **1c** was consistent with those previously reported.<sup>8</sup>

$\delta_{\text{H}}$  (400 MHz,  $\text{CDCl}_3$ ): 1.26 (d, J 7.0, 6H), 1.29 (d, J 6.8, 12H), 2.91 (septet, J 7.0, 1H), 4.36 (septet, J 6.7, 2H), 7.20 (s, 2H), 7.44-7.52 (m, 2H), 7.61 (t, J 7.5, 1H), 7.92 (d, J 7.1, 2H), 9.02 (s, 1H).

#### ***N*-(2-Methylphenyl)methylidene-2,4,6-triisopropylbenzenesulfonamide (16)**

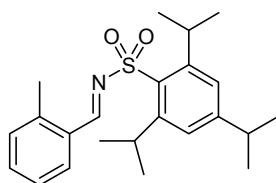

Prepared according to general procedure **A** using 2,4,6-triisopropylbenzenesulfonamide (500 mg, 1.764 mmol), triethylamine (738  $\mu\text{L}$ , 5.29 mmol), *o*-tolualdehyde (204  $\mu\text{L}$ , 1.76 mmol),  $\text{CH}_2\text{Cl}_2$  (6.0  $\text{cm}^3$ ) and titanium(IV) chloride (97  $\mu\text{L}$ , 0.88 mmol) in  $\text{CH}_2\text{Cl}_2$  (1  $\text{cm}^3$ ). After purification of the crude material by flash chromatography (1:1 hexane/ $\text{CHCl}_2$ ), **16** was obtained as a yellow solid (551 mg, 81%). M.p. 79-81 °C. The NMR spectrum of **16** was consistent with those previously reported.<sup>7</sup>

$\delta_{\text{H}}$  (400 MHz,  $\text{CDCl}_3$ ): 1.25 (d, J 6.4, 6H), 1.29 (d, J 7.0, 12H), 2.60 (s, 3H), 2.91 (septet, J 6.4, 1H), 4.37 (septet, J 6.7, 2H), 7.19 (s, 2H), 7.26-7.31 (m, 2H), 7.42-7.51 (m, 1H), 8.01 (d, J 7.6, 1H), 9.35 (s, 1H).

#### ***N*-(4-Chlorophenyl)methylidene-2,4,6-triisopropylbenzenesulfonamide (14)**

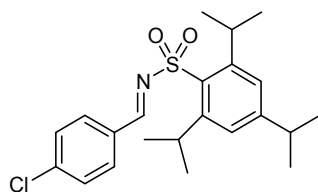

Prepared according to general procedure **A** using 2,4,6-triisopropylbenzenesulfonamide (500 mg, 1.764 mmol), triethylamine (738  $\mu\text{L}$ , 5.29 mmol), *p*-chlorobenzaldehyde (248 mg, 1.76 mmol),  $\text{CH}_2\text{Cl}_2$  (3.5  $\text{cm}^3$ )

and titanium(IV) chloride (97  $\mu\text{L}$ , 0.88 mmol) in  $\text{CH}_2\text{Cl}_2$  (1.0  $\text{cm}^3$ ). The crude product was recrystallised from  $\text{CH}_2\text{Cl}_2$ /hexane to afford **14** as an amorphous white solid (130 mg, 18%). M.p. 198-199  $^\circ\text{C}$ . The NMR spectrum of **14** was consistent with those previously reported.<sup>7</sup>

$\delta_{\text{H}}$  (400 MHz,  $\text{CDCl}_3$ ): 1.26 (d, J 7.0, 6H), 1.28 (d, J 6.5, 12H), 2.91 (septet, J 7.0, 1H), 4.32 (septet, J 6.5, 2H), 7.20 (s, 2H), 7.48 (d, J 8.5, 2H), 7.86 (d, J 8.5, 2H), 8.98 (s, 1H).

#### ***N*-(4-Methoxyphenyl)methylidene-2,4,6-triisopropylbenzenesulfonamide (18)**

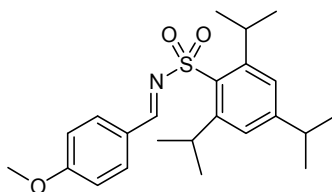

Prepared according to general procedure **A** using 2,4,6-triisopropylbenzenesulfonamide (500 mg, 1.764 mmol), triethylamine (738  $\mu\text{L}$ , 5.29 mmol), *p*-anisaldehyde (215  $\mu\text{L}$ , 1.76 mmol),  $\text{CH}_2\text{Cl}_2$  (6.0  $\text{cm}^3$ ) and titanium(IV) chloride (97  $\mu\text{L}$ , 0.88 mmol) in  $\text{CH}_2\text{Cl}_2$  (1  $\text{cm}^3$ ). The crude product was recrystallised from EtOAc/hexane to afford **18** as a yellow crystalline solid (403 mg, 57%). M.p. 189-190  $^\circ\text{C}$ . The NMR spectrum of **18** was consistent with those previously reported.<sup>7</sup>

$\delta_{\text{H}}$  (400 MHz,  $\text{CDCl}_3$ ): 1.25 (d, J 7.0, 6H), 1.28 (d, J 6.8, 12H), 2.90 (septet, J 6.9, 1H), 3.88 (s, 3H), 4.36 (septet, J 6.8, 2H), 6.97 (d, J 8.8, 2H), 7.18 (s, 2H), 7.88 (d, J 8.8, 2H), 8.92 (s, 1H).

#### ***N*-(1-Naphthyl)methylidene-2,4,6-triisopropylbenzenesulfonamide (15)**

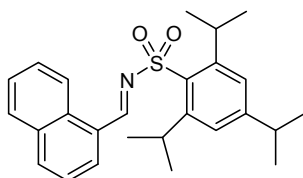

Prepared according to general procedure **A** using 2,4,6-triisopropylbenzenesulfonamide (400 mg, 1.411 mmol), triethylamine (590  $\mu\text{L}$ , 4.23 mmol), 1-naphthaldehyde (193  $\mu\text{L}$ , 1.41 mmol),  $\text{CH}_2\text{Cl}_2$  (10.0  $\text{cm}^3$ ) and



titanium(IV) chloride (78  $\mu\text{L}$ , 0.71 mmol). The crude product was recrystallised from  $\text{CH}_2\text{Cl}_2$ /hexane to afford **15** as a yellow solid (412 mg, 69%). M.p. 169-170  $^\circ\text{C}$ . The NMR spectrum of **15** was consistent with those previously reported.<sup>7</sup>

$\delta_{\text{H}}$  (600 MHz,  $\text{CDCl}_3$ ): 1.26 (d, J 6.9, 6H), 1.32 (d, J 6.8, 12H), 2.91 (septet, J 6.9, 1H), 4.46 (septet, J 6.7, 2H), 7.21 (s, 2H), 7.53-7.60 (m, 2H), 7.60-7.70 (m, 1H), 7.92 (d, J 8.1, 1H), 8.10 (d, J 8.2, 1H), 8.12 (d, J 7.1, 1H), 9.09 (d, J 8.5, 1H), 9.59 (s, 1H).

### 2,4,6-Triisopropyl-*N*-(3-phenylallylidene)benzenesulfonamide (**19**)

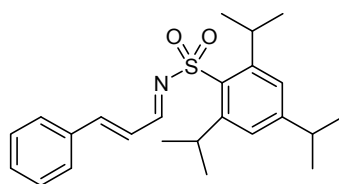

Prepared according to general procedure **A** using 2,4,6-triisopropylbenzenesulfonamide (400 mg, 1.41 mmol), triethylamine (590  $\mu\text{L}$ , 4.234 mmol), *trans*-cinnamaldehyde (178  $\mu\text{L}$ , 1.411 mmol),  $\text{CH}_2\text{Cl}_2$  (10.0  $\text{cm}^3$ ) and titanium(IV) chloride (78  $\mu\text{L}$ , 0.71 mmol). The crude product was recrystallised from EtOAc /hexane to afford **19** as a yellow solid (239 mg, 43%). M.p. 164-165  $^\circ\text{C}$  (lit<sup>9</sup> 166-167  $^\circ\text{C}$ ). The NMR spectrum of **19** was consistent with those previously reported.<sup>9</sup>

$\delta_{\text{H}}$  (400 MHz,  $\text{CDCl}_3$ ): 1.25 (d, J 7.0, 6H), 1.27 (d, J 6.8, 12H), 2.91 (septet, J 6.9, 1H), 4.24 (septet, J 6.8, 2H), 7.00 (dd, J 9.3, 15.8, 1H), 7.19 (s, 2H), 7.41-7.48 (m, 4H), 7.55-7.58 (m, 2H), 8.75 (d, J 9.3, 1H).

### *N*-(Mesityl)methylidene-2,4,6-triisopropylbenzenesulfonamide (**17**)

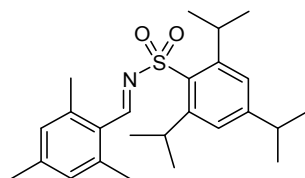

Prepared according to general procedure **A** using 2,4,6-triisopropylbenzenesulfonamide (400 mg, 1.411 mmol), triethylamine (590  $\mu\text{L}$ , 4.23 mmol), mesitaldehyde (205  $\mu\text{L}$ , 1.41 mmol),  $\text{CH}_2\text{Cl}_2$  (10.0  $\text{cm}^3$ ) and

titanium(IV) chloride (78  $\mu\text{L}$ , 0.71 mmol). The product was purified by column chromatography (7:3 hexane: $\text{CH}_2\text{Cl}_2$ ) to yield **17** as a white crystalline solid (378 mg, 65%). M.p. 64-66  $^\circ\text{C}$ .

$\delta_{\text{H}}$  (400 MHz,  $\text{CDCl}_3$ ): 1.25 (d, J 7.1, 6H), 1.28 (d, J 6.8, 12H), 2.32 (s, 3H), 2.55 (s, 6H), 2.91 (septet, J 6.9, 1H), 4.36 (septet, J 6.7, 2H), 6.93 (s, 2H), 7.18 (s, 2H), 9.49 (s, 1H).

$\delta_{\text{C}}$  (100 MHz,  $\text{CDCl}_3$ ): 21.7, 21.9, 23.7, 24.9, 29.9, 34.4, 123.9, 126.4 (q), 130.8, 131.6 (q), 142.8 (q), 144.5 (q), 151.4 (q), 153.6 (q), 168.0.

$\nu$  ( $\text{cm}^{-1}$ ): 667, 772, 829, 1041, 1148, 1294, 1314, 1560, 1594, 2871, 2926, 2960.

HRMS (ESI):  $[\text{M}+\text{H}]^+$  Calcd. for  $\text{C}_{25}\text{H}_{36}\text{NO}_2\text{S}$  414.2467; found 414.2477.

#### *N*-(Cyclohexyl)methylidene-2,4,6-triisopropylbenzenesulfonamide (**20**)

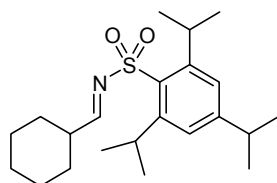

Prepared according to general procedure **A** using 2,4,6-triisopropylbenzenesulfonamide (400 mg, 1.411 mmol), triethylamine (590  $\mu\text{L}$ , 4.23 mmol), cyclohexanecarboxaldehyde (171  $\mu\text{L}$ , 1.411 mmol),  $\text{CH}_2\text{Cl}_2$  (10.0  $\text{cm}^3$ ) and titanium(IV) chloride (78  $\mu\text{L}$ , 0.71 mmol). The crude product was recrystallised from  $\text{CH}_2\text{Cl}_2$  /hexane to afford **20** as a white solid (214 mg, 40%). M.p. 93-95  $^\circ\text{C}$ .

$\delta_{\text{H}}$  (400 MHz,  $\text{CDCl}_3$ ): 1.24-1.36 (m, 23H), 1.66-1.69 (m, 1H, H-4b), 1.74-1.80 (m, 2H), 1.87-1.93 (m, 2H), 2.42-2.45 (m, 1H), 2.90 (septet, J 6.9, 1H), 4.16 (septet, J 6.8, 2H), 7.17 (s, 2H), 8.45 (d, J 4.2, 1H).

$\delta_{\text{C}}$  (100 MHz,  $\text{CDCl}_3$ ): 23.7, 24.9, 25.3, 25.8, 28.5, 29.9, 34.4, 43.8, 123.9, 130.6 (q), 151.5 (q), 153.8 (q), 179.1.

$\nu$  ( $\text{cm}^{-1}$ ): 671, 778, 799, 1152, 1295, 1312, 1621, 2852, 2926, 2953.

HRMS (ESI):  $[\text{M}+\text{H}]^+$  Calcd. for  $\text{C}_{22}\text{H}_{36}\text{NO}_2\text{S}$  378.2467; found 378.2451.

## 5.0 Catalysis of the aziridination of imines **1a-1e** (Table 2): General procedure B

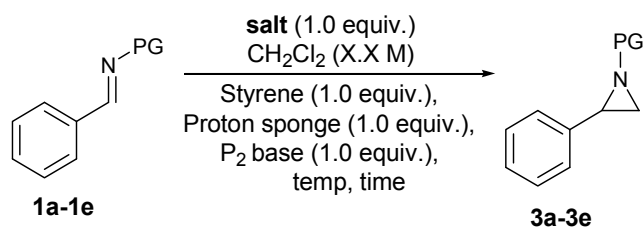

**Note:** These reactions must be carried out under rigorous anhydrous conditions.

An oven dried round bottomed flask containing a magnetic stirring bar and (**R,R**)-**13** (1 equiv.) was charged with proton sponge (1 equiv.) and the appropriate imine (1 equiv.). The flask was placed on a Schlenk line for 1 h. The flask was then immediately flushed with argon, fitted with a rubber septum and placed under an atmosphere of argon (balloon). Freshly distilled  $\text{CH}_2\text{Cl}_2$  and styrene (1 equiv.) were then added sequentially *via* syringe. The resulting solution was allowed to stir at the appropriate temperature until such time as temperature equilibration was reached.  $\text{P}_2$  base (2.0 M in THF, 1 equiv.) was then added dropwise. Upon completion (analysis by  $^1\text{H-NMR}$ ), the crude material was purified by column chromatography to furnish the corresponding aziridine.

### 5.1 Characterisation data for aziridines **3a-3e**

#### (-)-1,2-Diphenylaziridine (**3d**)

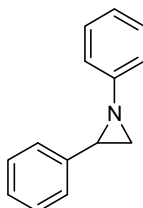

Prepared according to general procedure **B** at ambient temperature using (**R,R**)-**13** (86.23 mg, 0.256 mmol), proton sponge (54.93, 0.256 mmol), *N*-benzylideneaniline (46.45 mg, 0.256 mmol),  $\text{CH}_2\text{Cl}_2$  (0.64  $\text{cm}^3$ ), styrene (29.4  $\mu\text{L}$ , 0.256 mmol) and  $\text{P}_2$  base (128.2  $\mu\text{L}$ , 0.256 mmol). Upon completion, *i.e.* 1.5 h, the yield was determined by  $^1\text{H-NMR}$  spectroscopy using styrene as an internal standard (31%). To determine the enantiomeric excess, a small amount of the crude material was purified by column chromatography (6:4 hexane/ $\text{CH}_2\text{Cl}_2$ ) to furnish the desired aziridine as a light yellow oil (13% *ee*).  $[\alpha]_{\text{D}}^{20} = -59.3$  (c 0.10,  $\text{CHCl}_3$ ,

13% *ee*); lit.<sup>10</sup>  $[\alpha]_D = -381.2$  (*c* 0.25, CHCl<sub>3</sub>, 90% *ee*). The NMR spectrum of **3d** was consistent with those previously reported.<sup>11</sup>

CSP-HPLC analysis: Chiralpak OJ-H (4.6 mm x 25 cm), hexane/IPA: 7/3, 1.0 mL min<sup>-1</sup>, RT, UV detection at 254 nm, retention times: 11.7 min (minor enantiomer) and 13.9 min (major enantiomer).

$\delta_H$  (400 MHz, CDCl<sub>3</sub>): 2.37-2.43 (m, 1H), 2.45-2.50 (m, 1H), 3.11 (dd, *J* 3.3, 6.6, 1H), 6.99 (t, *J* 7.4, 1H), 7.05 (d, *J* 7.7, 2H), 7.24-7.40 (m, 7H).

HRMS (ESI):  $[M+H]^+$  Calcd. for C<sub>14</sub>H<sub>14</sub>N 196.1126; found 196.1120.

### 1-(4'-Methoxyphenyl)-2-phenylaziridine (**3b**)

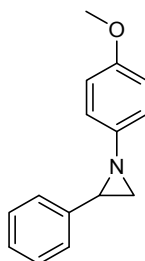

Prepared according to general procedure **B** at ambient temperature using **7** (60.00 mg, 0.238 mmol), proton sponge (50.97 mg, 0.238 mmol), *N*-benzylidene-4-methoxybenzenamine (50.25 mg, 0.238 mmol), CH<sub>2</sub>Cl<sub>2</sub> (0.6 cm<sup>3</sup>), styrene (27.3  $\mu$ L, 0.238 mmol) and P<sub>2</sub> base (119.0  $\mu$ L, 0.238 mmol). Upon completion, *i.e.* 40 min, the yield was determined by <sup>1</sup>H-NMR spectroscopy using styrene as an internal standard (55%). To determine the enantiomeric excess, a small amount of the crude material was purified by column chromatography (95:5 hexane/Et<sub>2</sub>O) to furnish the desired aziridine as a light yellow oil. The NMR spectrum of **3b** was consistent with those previously reported.<sup>12</sup>

$\delta_H$  (400 MHz, CDCl<sub>3</sub>): 2.37-2.43 (m, 1H), 2.45-2.50 (m, 1H), 3.03 (dd, *J* 3.3, 6.6, 1H), 3.77 (s, 3H), 6.80 (d, *J* 8.8, 2H), 6.99 (d, *J* 8.7, 2H), 7.28-7.39 (m, 5H).

HRMS (ESI):  $[M+H]^+$  Calcd. for C<sub>15</sub>H<sub>16</sub>NO 226.1232; found 226.1224.

### (*R*)-2-Phenyl-1-(*p*-toluenesulfonyl)aziridine (**3a**)

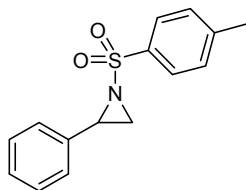

Prepared according to general procedure **B** at ambient temperature using (*R,R*)-**13** (80.04 mg, 0.238 mmol), proton sponge (50.99, 0.238 mmol), *N*-(benzylidene)-4-methylbenzenesulfonamide (61.64 mg, 0.238 mmol), CH<sub>2</sub>Cl<sub>2</sub> (0.60 cm<sup>3</sup>), styrene (27.3 μL, 0.238 mmol) and P<sub>2</sub> base (119.0 μL, 0.238 mmol). Upon completion, *i.e.* 40 min, the yield was determined by <sup>1</sup>H-NMR spectroscopy using styrene as an internal standard (87%). To determine the enantiomeric excess, a small amount of the crude material was purified by column chromatography (9:1 hexane/EtOAc) to furnish the desired aziridine as a white solid (6% *ee*). M.p. 93-95 °C (lit.<sup>13</sup> 92-93 °C). [α]<sub>D</sub><sup>20</sup> = -15.30 (c 0.3, CHCl<sub>3</sub>, 6% *ee*); lit.<sup>13</sup> [α]<sub>D</sub><sup>24</sup> = -80.25 (c 0.8, CHCl<sub>3</sub>). The NMR spectrum of **3a** was consistent with those previously reported.<sup>13</sup>

CSP-HPLC analysis: Chiralpak OJ-H (4.6 mm x 25 cm), hexane/IPA: 1/1, 0.7 mL min<sup>-1</sup>, RT, UV detection at 220 nm, retention times: 17.5 min (minor enantiomer) and 21.1 min (major enantiomer).

δ<sub>H</sub> (400 MHz, CDCl<sub>3</sub>): 2.39 (d, J 4.4, 1H), 2.43 (s, 3H), 2.99 (d, J 7.2, 1H), 3.77 (dd, J 4.5, 7.0, 1H), 7.20-7.34 (m, 7H), 7.87 (d, J 8.3, 2H).

### *N*-Diphenylphosphinyl-2-phenyl aziridine (**3e**)

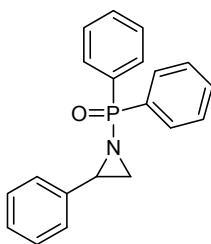

Prepared according to general procedure **B** at 60 °C using (*R,R*)-**13** (31.41 mg, 0.093 mmol), proton sponge (20.00 mg, 0.093 mmol), *P,P*-diphenyl-*N*-(phenylmethylene)phosphinic amide (28.50 mg, 0.093 mmol), CH<sub>2</sub>Cl<sub>2</sub> (0.23 cm<sup>3</sup>), styrene (10.7 μL, 0.09 mmol) and P<sub>2</sub> base (47.0 μL, 0.09 mmol). Upon completion, *i.e.* 30

min, the yield was determined by  $^1\text{H-NMR}$  spectroscopy using styrene as an internal standard (98%). To determine the enantiomeric excess, a small amount of the crude material was purified by column chromatography (7:3 hexane/EtOAc) to furnish the desired aziridine as a white solid (10% *ee*). M.p. 92-93 °C (lit.<sup>14</sup> 91 °C).  $[\alpha]_{\text{D}}^{20} = +25.0$  (c 0.1,  $\text{CH}_2\text{Cl}_2$ , 10% *ee*); lit.<sup>14</sup>  $[\alpha]_{\text{D}}^{23} = -4.6$  (c 5.0,  $\text{CH}_2\text{Cl}_2$ ), opposite enantiomer. The NMR spectra of **3e** were consistent with those previously reported.<sup>14</sup>

CSP-HPLC analysis: Chiralpak AD-H (4.6 mm x 25 cm), hexane/IPA: 9/1, 1.0 mL min<sup>-1</sup>, RT, UV detection at 220 nm, retention times: 18.8 min (major enantiomer) and 28.9 (minor enantiomer).

$\delta_{\text{H}}$  (600 MHz,  $\text{CDCl}_3$ ): 2.22 (ddd, J 1.8, 3.6, 13.1, 1H), 2.94 (ddd, J 1.4, 6.2, 17.8, 1H), 3.77 (ddd, J 3.3, 6.3, 15.6, 1H), 7.29-7.40 (m, 7H), 7.44-7.56 (m, 4H), 7.87-7.92 (m, 2H), 7.97-8.03 (m, 2H).

$\delta_{\text{P}}$  (162 MHz,  $\text{CDCl}_3$ ): 33.9 (s, 1P).

### (*R*)-2-Phenyl-1-(2,4,6-triisopropylbenzenesulfonyl)aziridine (**3c**)

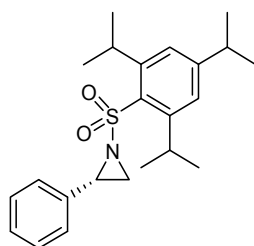

An oven dried round bottomed flask containing a magnetic stirring bar and (*2R,5R*)-2,5-diisopropyl-thiolane triflate (21.36 mg, 0.063 mmol) was charged with proton sponge (13.60 mg, 0.063 mmol), *N*-phenylmethyldiene-2,4,6-triisopropylbenzenesulfonamide (23.58 mg, 0.063 mmol) and activated 3 Å molecular sieves. The flask was placed on a Schlenk line for 1 h. The flask was then immediately flushed with argon, fitted with a rubber septum and placed under an atmosphere of argon (balloon). Freshly distilled  $\text{CH}_2\text{Cl}_2$  (0.79 cm<sup>3</sup>) stored over activated 3 Å molecular sieves and styrene (7.3  $\mu\text{L}$ , 0.063 mmol), were then added sequentially *via* syringe. The resulting solution was cooled to -78 °C. P<sub>2</sub> base (2.0 M in THF, 31.7  $\mu\text{L}$ , 0.063 mmol) was then added dropwise. Upon completion, *i.e.* 16 h, the crude material was purified by column chromatography (8:2 hexane/ $\text{CH}_2\text{Cl}_2$ ) to furnish the desired aziridine **3c** as a white solid (22.20 mg, 91%, 23% *ee*). M.p. 82-84 °C.  $[\alpha]_{\text{D}}^{20} = -7.9$  (c 0.16,  $\text{CH}_2\text{Cl}_2$ , 23% *ee*).

CSP-HPLC analysis: Chiralpak AD-H (4.6 mm x 25 cm), hexane/IPA: 9.5/0.5, 0.5 mL min<sup>-1</sup>, RT, UV detection at 220 nm, retention times: 10.0 min (minor enantiomer) and 12.2 (major enantiomer).

$\delta_{\text{H}}$  (400 MHz, CDCl<sub>3</sub>): 1.23-1.28 (m, 18H), 2.37 (d, J 4.4, 1H), 2.90 (septet, J 6.9, 1H), 3.04 (d, J 7.2, 1H), 3.80 (dd, J 4.4, 7.2, 1H), 4.40 (septet, J 6.8, 2H), 7.17 (s, 2H), 7.18-7.21 (m, 2H), 7.26-7.32 (m, 3H).

$\delta_{\text{C}}$  (100 MHz, CDCl<sub>3</sub>): 23.7, 24.9, 25.1, 29.9, 34.4, 36.3, 40.7, 124.0, 126.6, 128.3, 128.6, 131.4 (q), 135.8 (q), 151.4 (q), 153.7 (q).

$\nu$  (cm<sup>-1</sup>): 694, 758, 1151, 1313, 1462, 1562, 1602, 2869, 2929, 2957.

HRMS (EI): [M]<sup>+</sup> Calcd. for C<sub>23</sub>H<sub>31</sub>NO<sub>2</sub>S 385.2076; found 385.2061.

## 6.0 Catalysis of the aziridination of imines **1c** and **14-20** using (*R,R*)-**13** under optimised conditions (Table 3): General procedure C

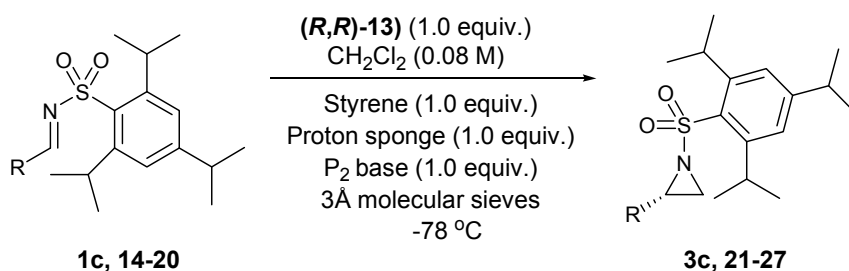

An oven dried round bottomed flask containing a magnetic stirring bar and (*R,R*)-**13** (1 equiv.) was charged with proton sponge (1 equiv.), appropriate imine (1 equiv.) and activated 3Å molecular sieves. The flask was placed on a Schlenk line for 1 h. The flask was then immediately flushed with argon, fitted with a rubber septum and placed under an atmosphere of argon (balloon). Freshly distilled CH<sub>2</sub>Cl<sub>2</sub> (0.08 M) stored over activated 3Å molecular sieves and styrene (1 equiv.), were then added sequentially *via* syringe. The resulting solution was cooled to -78 °C. P<sub>2</sub> base (2.0 M in THF, 1 equiv.) was then added dropwise. Upon completion (analysis by <sup>1</sup>H-NMR spectroscopy), the crude material was purified by column chromatography to furnish the corresponding aziridine.





Prepared according to general procedure C using (2*R*,5*R*)-2,5-diisopropyl-thiolane triflate (22.18 mg, 0.066 mmol), *N*-(2-methylphenyl)methylidene-2,4,6-triisopropylbenzenesulfonamide (25.42 mg, 0.066 mmol), proton sponge (14.13 mg, 0.066 mmol), CH<sub>2</sub>Cl<sub>2</sub> (0.82 cm<sup>3</sup>), styrene (7.6 μL, 0.07 mmol) and P<sub>2</sub> base (2.0 M in THF, 33.0 μL, 0.066 mmol). Upon completion, *i.e.* 16 h, the crude material was purified by column chromatography (8:2 hexane/CH<sub>2</sub>Cl<sub>2</sub>) to furnish the desired aziridine **23** as a white solid (22.90 mg, 87%, 30% *ee*). M.p. 68-70 °C. [α]<sub>D</sub><sup>20</sup> = - 16.0 (c 0.2, CH<sub>2</sub>Cl<sub>2</sub>, 30% *ee*).

CSP-HPLC analysis: Chiralpak AD-H (4.6 mm x 25 cm), hexane/IPA: 9.8/0.2, 0.5 mL min<sup>-1</sup>, RT, UV detection at 220 nm, retention times: 11.3 min (minor enantiomer) and 13.0 (major enantiomer).

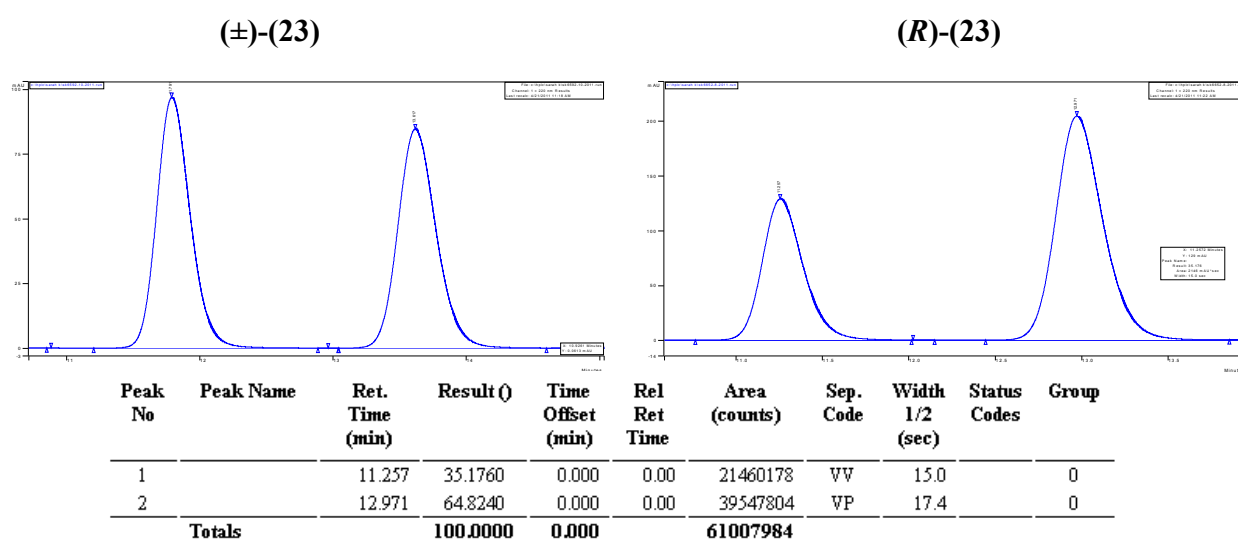

δ<sub>H</sub> (600 MHz, CDCl<sub>3</sub>): 1.25-1.28 (m, 18H), 2.29 (d, J 4.5, 1H), 2.34 (s, 3H), 2.91 (septet, J 6.9, 1H), 3.02 (d, J 7.2, 1H), 3.94 (dd, J 4.5, 7.3, 1H), 4.42 (septet, J 6.8, 2H), 7.12-7.19 (m, 6H).

δ<sub>C</sub> (150 MHz, CDCl<sub>3</sub>): 19.1, 23.7, 25.0, 25.1, 30.0, 34.4, 35.5, 38.8, 124.0, 125.9, 126.3, 128.0, 130.1, 131.5 (q), 134.0 (q), 136.8 (q), 151.4 (q), 153.7 (q).

ν (cm<sup>-1</sup>): 661, 773, 894, 1105, 1319, 1460, 1601, 2865, 2925, 2959.

HRMS (ESI): [M+Na]<sup>+</sup> Calcd. for C<sub>24</sub>H<sub>33</sub>NO<sub>2</sub>SNa 422.2130; found 422.2111.



$\delta_C$  (150 MHz,  $CDCl_3$ ): 23.7, 25.0, 25.1, 29.9, 34.4, 36.4, 39.9, 124.1, 128.0, 128.9, 131.2 (q), 134.3 (q), 134.4 (q), 151.4 (q), 153.9 (q).

$\nu$  ( $cm^{-1}$ ): 694, 811, 914, 1151, 1310, 1494, 1602, 2869, 2928, 2960.

HRMS (ESI):  $[M+Na]^+$  Calcd. for  $C_{23}H_{30}NO_2ClSNa$  442.1583; found 442.1564.

**(R)-2-(4-Methoxyphenyl)-1-(2,4,6-triisopropylbenzenesulfonyl)aziridine (25)**

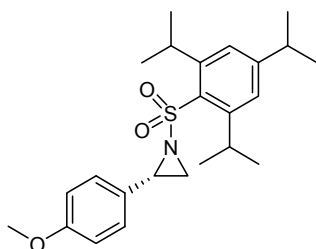

Prepared according to general procedure C using (2*R*,5*R*)-2,5-diisopropyl-thiolane triflate (29.24 mg, 0.087 mmol), *N*-(4-methoxyphenyl)methylidene-2,4,6-triisopropylbenzenesulfonamide (34.90 mg, 0.087 mmol),  $CH_2Cl_2$  (1.09  $cm^3$ ), styrene (10.0  $\mu L$ , 0.087 mmol) and  $P_2$  base (2.0 M in THF, 44.0  $\mu L$ , 0.087 mmol). Upon completion, *i.e.* 16 h, the crude material was purified by column chromatography on silica that had been deactivated by packing column using 7:3:0.5 hexane/  $CH_2Cl_2$ /triethylamine and using 8:2 hexane/ $CH_2Cl_2$  as eluent. The desired aziridine (**25**) was obtained as a white solid (33.23 mg, 92%, 25% *ee*). M.p. 86-88 °C.  $[\alpha]_D^{20} = -29.0$  (c 0.2,  $CH_2Cl_2$ , 25% *ee*).

CSP-HPLC analysis: Chiralpak AD-H (4.6 mm x 25 cm), hexane/IPA: 9.5/0.5, 1.0  $mL\ min^{-1}$ , RT, UV detection at 220 nm, retention times: 6.7 min (minor enantiomer) and 9.4 (major enantiomer).

(±)-(25)

(*R*)-(25)

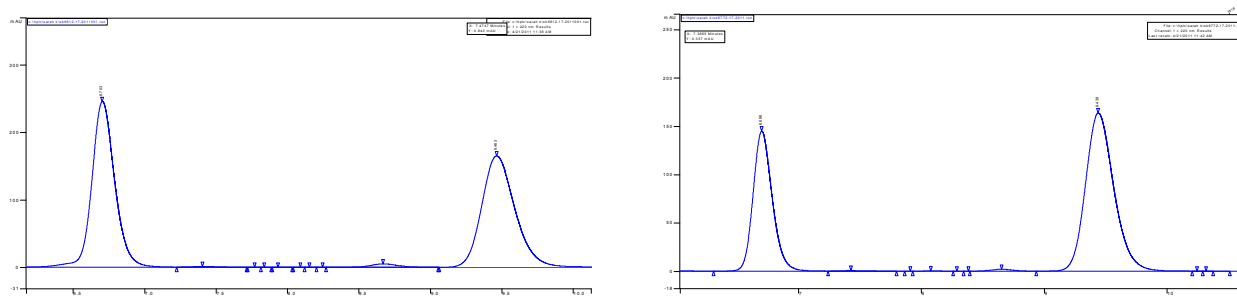

| Peak No | Peak Name | Ret. Time (min) | Result () | Time Offset (min) | Rel Ret Time | Area (counts) | Sep. Code | Width 1/2 (sec) | Status Codes | Group |
|---------|-----------|-----------------|-----------|-------------------|--------------|---------------|-----------|-----------------|--------------|-------|
| 1       |           | 6.698           | 37.5295   | 0.000             | 0.00         | 15808877      | VP        | 9.9             |              | 0     |
| 2       |           | 9.439           | 62.4705   | 0.000             | 0.00         | 26315040      | VB        | 14.6            |              | 0     |
| Totals  |           |                 | 100.0000  | 0.000             |              | 42123916      |           |                 |              |       |

$\delta_{\text{H}}$  (600 MHz,  $\text{CDCl}_3$ ): 1.21-1.27 (m, 18H), 2.35 (d, J 4.4, 1H), 2.90 (septet, J 6.9, 1H), 3.01 (d, J 7.1, 1H), 3.75 (dd, J 4.6, 7.3, 1H), 3.78 (s, 3H), 4.39 (septet, J 6.8, 2H), 6.82 (d, J 8.7, 2H), 7.11 (d, J 8.7, 2H), 7.17 (s, 2H).

$\delta_{\text{C}}$  (150 MHz,  $\text{CDCl}_3$ ): 23.7, 25.0, 25.1, 29.9, 34.4, 36.1, 40.5, 55.4, 114.1, 124.0, 127.7 (q), 127.9, 131.5 (q), 151.3 (q), 153.6 (q), 159.8 (q).

$\nu$  ( $\text{cm}^{-1}$ ): 668, 695, 818, 902, 1152, 1256, 1303, 1519, 1601, 2868, 2929, 2959.

HRMS (ESI):  $[\text{M}+\text{Na}]^+$  Calcd. for  $\text{C}_{24}\text{H}_{33}\text{NO}_3\text{SNa}$  438.2079; found 438.2077.

**(R)-2-(1-Naphthyl)-1-(2,4,6-triisopropylbenzenesulfonyl)aziridine (22)**

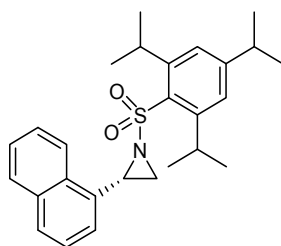

Prepared according to general procedure **C** using (2*R*,5*R*)-2,5-diisopropyl-thiolane triflate (27.37 mg, 0.081 mmol), *N*-(1-naphthyl)methylidene-2,4,6-triisopropylbenzenesulfonamide (34.30 mg, 0.081 mmol), proton sponge (17.43 mg, 0.081 mmol),  $\text{CH}_2\text{Cl}_2$  (1.00  $\text{cm}^3$ ), styrene (9.3  $\mu\text{L}$ , 0.08 mmol) and  $\text{P}_2$  base (2.0 M in THF, 40.7  $\mu\text{L}$ , 0.08 mmol). Upon completion, *i.e.* 16 h, the crude material was purified by column chromatography (7:3 hexane/ $\text{CH}_2\text{Cl}_2$ ) to furnish the desired aziridine (**22**) as a white solid (32.60 mg, 92%, 23% *ee*). M.p. 66-68 °C.  $[\alpha]_{\text{D}}^{20} = -2.3$  (c 0.2,  $\text{CH}_2\text{Cl}_2$ , 23% *ee*).

CSP-HPLC analysis: Chiralpak AD-H (4.6 mm x 25 cm), hexane/IPA: 9.9/0.1, 1.0 mL min<sup>-1</sup>, RT, UV detection at 220 nm, retention times: 10.8 min (minor enantiomer) and 12.1 (major enantiomer).

(±)-(22)

(R)-(22)

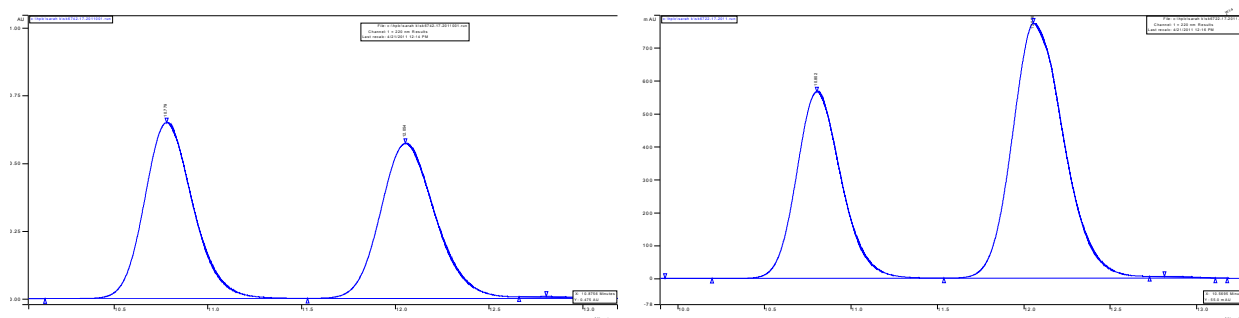

| Peak No       | Peak Name | Ret. Time (min) | Result (%)      | Time Offset (min) | Rel Ret Time | Area (counts)    | Sep. Code | Width 1/2 (sec) | Status Codes | Group |
|---------------|-----------|-----------------|-----------------|-------------------|--------------|------------------|-----------|-----------------|--------------|-------|
| 1             |           | 1.888           | 0.5488          | 0.000             | 0.00         | 1468506          | VV        | 33.0            |              | 0     |
| 2             |           | 8.490           | 0.3863          | 0.000             | 0.00         | 1033701          | VV        | 11.0            |              | 0     |
| 3             |           | 10.802          | 38.3555         | 0.000             | 0.00         | 102637968        | PV        | 16.9            |              | 0     |
| 4             |           | 12.056          | 60.7095         | 0.000             | 0.00         | 162456512        | VB        | 19.0            |              | 0     |
| <b>Totals</b> |           |                 | <b>100.0001</b> | <b>0.000</b>      |              | <b>267596688</b> |           |                 |              |       |

$\delta_H$  (600 MHz, CDCl<sub>3</sub>): 1.21-1.34 (m, 18H), 2.44 (d, J 4.4, 1H), 2.92 (septet, J 6.9, 1H), 3.18 (d, J 7.1, 1H), 4.42 (dd, J 4.6, 7.1, 1H), 4.48 (septet, J 6.7, 2H), 7.20 (s, 2H), 7.37-7.43 (m, 2H), 7.46-7.51 (m, 2H), 7.79 (d, J 7.7, 1H), 7.86 (d, J 7.4, 1H), 8.09 (d, J 8.0, 1H).

$\delta_C$  (100 MHz, CDCl<sub>3</sub>): 23.7, 25.0, 25.1, 30.0, 34.4, 35.2, 39.1, 123.1, 124.1, 124.4, 125.4, 126.1, 126.6, 128.7, 128.8, 131.4 (q), 131.6 (q), 131.7 (q), 133.4 (q), 151.4 (q), 153.8 (q).

$\nu$  (cm<sup>-1</sup>): 670, 699, 779, 903, 1151, 1313, 1601, 2868, 2927, 2959.

HRMS (ESI): [M+Na]<sup>+</sup> Calcd. for C<sub>27</sub>H<sub>33</sub>NO<sub>2</sub>SNa 458.2130; found 458.2130.

**(R)-2-(Styryl)-1-(2,4,6-triisopropylbenzenesulfonyl)aziridine (26)**

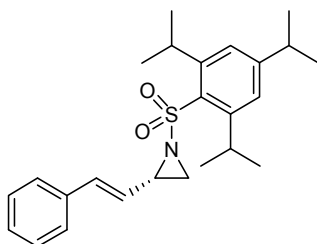

Prepared according to general procedure C using (2*R*,5*R*)-2,5-diisopropyl-thiolane triflate (28.25 mg, 0.084 mmol), 2,4,6-triisopropyl-*N*-(3-phenylallylidene)benzenesulfonamide (33.38 mg, 0.084 mmol), CH<sub>2</sub>Cl<sub>2</sub> (1.05 cm<sup>3</sup>), styrene (9.6 μL, 0.084 mmol) and P<sub>2</sub> base (2.0 M in THF, 42.0 μL, 0.084 mmol). Upon completion, *i.e.* 16 h, the crude material was purified by column chromatography on silica that had been deactivated by packing column using 7:3:0.5 hexane/ CH<sub>2</sub>Cl<sub>2</sub>/triethylamine and using 8:2 hexane/CH<sub>2</sub>Cl<sub>2</sub> as eluent. The desired aziridine (**26**) was obtained as a white solid (31.79 mg, 92%, 18% *ee*). M.p. 134-136 °C. [α]<sub>D</sub><sup>20</sup> = - 20.0 (*c* 0.17, CH<sub>2</sub>Cl<sub>2</sub>, 18% *ee*).

CSP-HPLC analysis: Chiralpak AD-H (4.6 mm x 25 cm), hexane/IPA: 9.9/0.1, 1.0 mL min<sup>-1</sup>, RT, UV detection at 220 nm, retention times: 10.4 min (minor enantiomer) and 17.2 (major enantiomer).

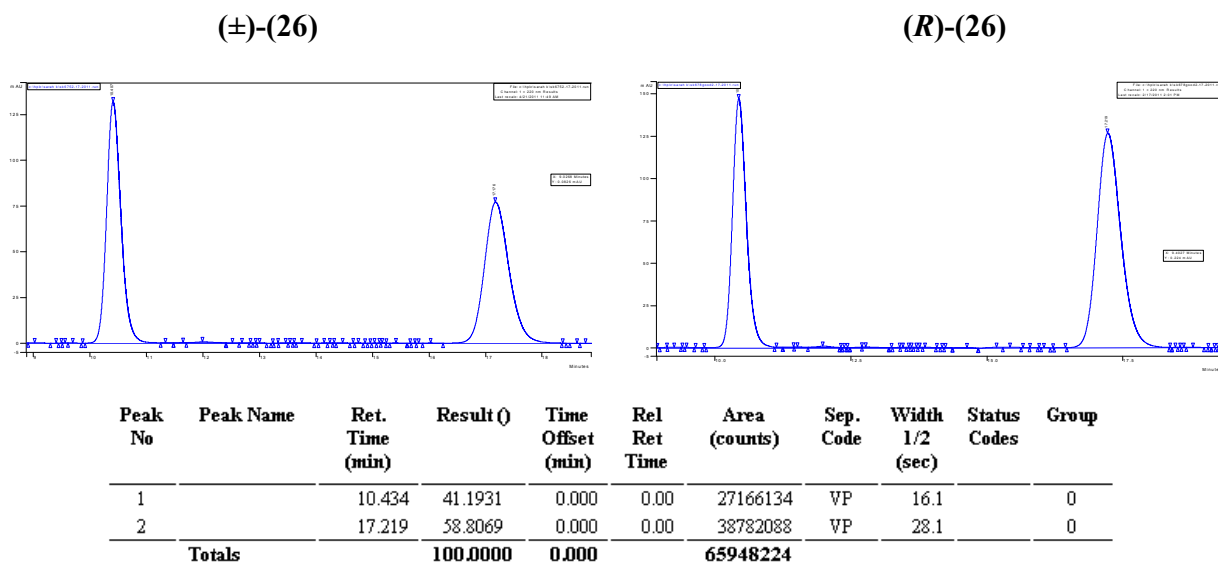

δ<sub>H</sub> (400 MHz, CDCl<sub>3</sub>): 1.24-1.29 (m, 18H), 2.30 (d, J 4.4, 1H), 2.85-2.91 (m, 2H), 3.45-3.50 (m, 1H), 4.36 (septet, J 6.8, 2H), 5.86 (dd, J 7.7, 16.2, 1H), 6.69 (d, J 15.9, 1H), 7.18 (s, 2H), 7.24-7.32 (m, 5H).

$\delta_C$  (100 MHz,  $CDCl_3$ ): 23.7, 25.0, 25.1, 29.9, 34.4, 34.8, 40.8, 124.0, 124.8, 126.5, 128.3, 128.8, 131.6 (q), 134.7, 136.0 (q), 151.2 (q), 153.6 (q).

$\nu$  ( $cm^{-1}$ ): 663, 700, 755, 786, 939, 973, 1145, 1308, 1602, 2868, 2956.

HRMS (ESI):  $[M+Na]^+$  Calcd. for  $C_{25}H_{33}NO_2SNa$  434.2130; found 434.2135.

**(R)-2-Mesityl-1-(2,4,6-triisopropylbenzenesulfonyl)aziridine (24)**

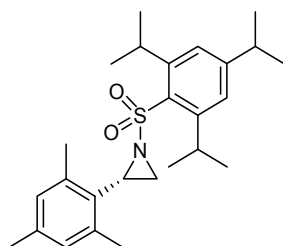

Prepared according to general procedure C using (2*R*,5*R*)-2,5-diisopropyl-thiolane triflate (27.27 mg, 0.081 mmol), *N*-(mesityl)methylidene-2,4,6-triisopropylbenzenesulfonamide (33.53 mg, 0.081 mmol), proton sponge (17.37 mg, 0.081 mmol),  $CH_2Cl_2$  (1.01  $cm^3$ ), styrene (9.3  $\mu L$ , 0.081 mmol) and  $P_2$  base (2.0 M in THF, 40.5  $\mu L$ , 0.081 mmol). Upon completion, *i.e.* 16 h, the crude material was purified by column chromatography (7:3 hexane/ $CH_2Cl_2$ ) to furnish the desired aziridine (**24**) as a white solid (30.16 mg, 87%, 25% *ee*). M.p. 87-89 °C.  $[\alpha]_D^{20} = -8.6$  (c 0.3,  $CH_2Cl_2$ , 25% *ee*).

CSP-HPLC analysis: Chiralpak AD-H (4.6 mm x 25 cm), hexane/IPA: 9.9/0.1, 1.0  $mL\ min^{-1}$ , RT, UV detection at 220 nm, retention times: 5.2 min (minor enantiomer) and 6.1 (major enantiomer).

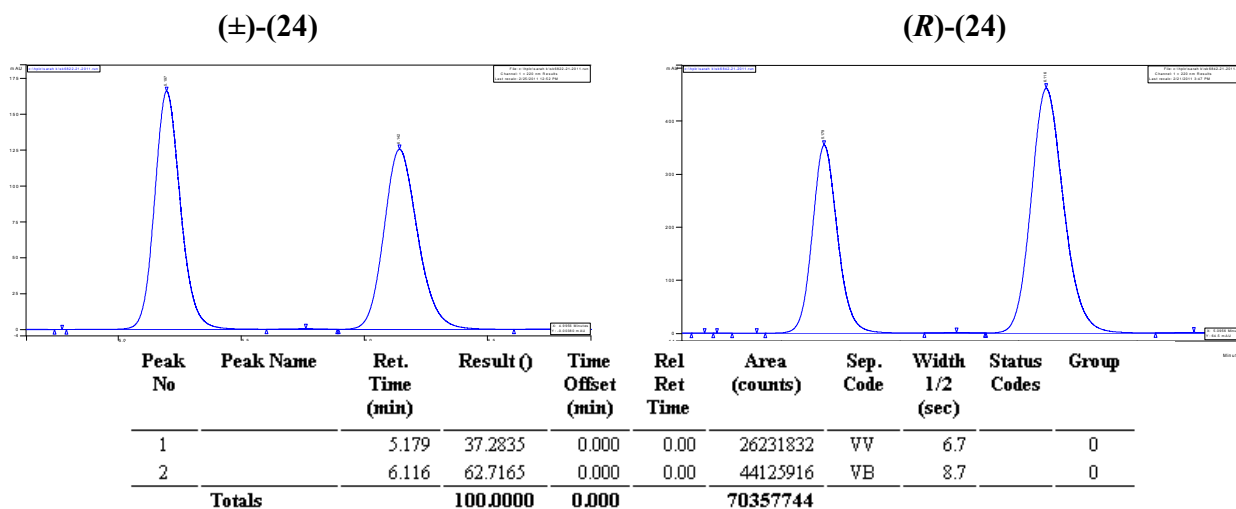

$\delta_{\text{H}}$  (600 MHz,  $\text{CDCl}_3$ ): 1.24-1.29 (m 18H), 2.16 (d, J 4.7, 1H), 2.24 (s, 3H), 2.29 (s, 6H), 2.89 (d, J 7.2, 1H), 2.92 (septet, J 6.9, 1H), 3.96 (dd, J 5.1, 7.3, 1H), 4.40 (septet, J 6.8, 2H), 6.80 (s, 2H), 7.19 (s, 2H).

$\delta_{\text{C}}$  (100 MHz,  $\text{CDCl}_3$ ): 20.2, 21.0, 23.7, 24.9, 25.3, 29.9, 34.37, 34.41, 39.9, 124.0, 128.8 (q), 129.3, 131.6 (q), 137.5 (q), 137.6 (q), 151.4 (q), 153.7 (q).

$\nu$  ( $\text{cm}^{-1}$ ): 660, 699, 716, 834, 911, 1152, 1313, 1460, 1599, 2869, 2927, 2960.

HRMS (ESI):  $[\text{M}+\text{Na}]^+$  Calcd. for  $\text{C}_{26}\text{H}_{37}\text{NO}_2\text{SNa}$  450.2443; found 450.2453.

**(R)-2-Cyclohexyl-1-(2,4,6-triisopropylbenzenesulfonyl)aziridine (27)**

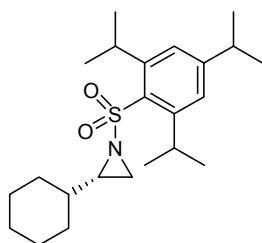

Prepared according to general procedure C using (2*R*,5*R*)-2,5-diisopropyl-thiolane triflate (30.05 mg, 0.089 mmol), *N*-(cyclohexyl)methylidene-2,4,6-triisopropylbenzenesulfonamide (33.72 mg, 0.089 mmol), proton sponge (19.14 mg, 0.089 mmol),  $\text{CH}_2\text{Cl}_2$  (1.12  $\text{cm}^3$ ), styrene (10.2  $\mu\text{L}$ , 0.089 mmol) and  $\text{P}_2$  base (2.0 M in THF, 45.0  $\mu\text{L}$ , 0.089 mmol). Upon completion, *i.e.* 16 h, the crude material was purified by column chromatography (7:3 hexane/ $\text{CH}_2\text{Cl}_2$ ) to furnish the desired aziridine (**27**) as a white solid (31.82 mg, 91%, 20% *ee*). M.p. 111-113 °C.  $[\alpha]_{\text{D}}^{20} = -9.5$  (c 0.2,  $\text{CH}_2\text{Cl}_2$ , 20% *ee*).



CSP-HPLC analysis: Chiralpak AD-H (4.6 mm x 25 cm), hexane/IPA: 9/1, 1.0 mL min<sup>-1</sup>, RT, UV detection at 220 nm, retention times: 3.6 min (major enantiomer) and 4.4 (minor enantiomer).

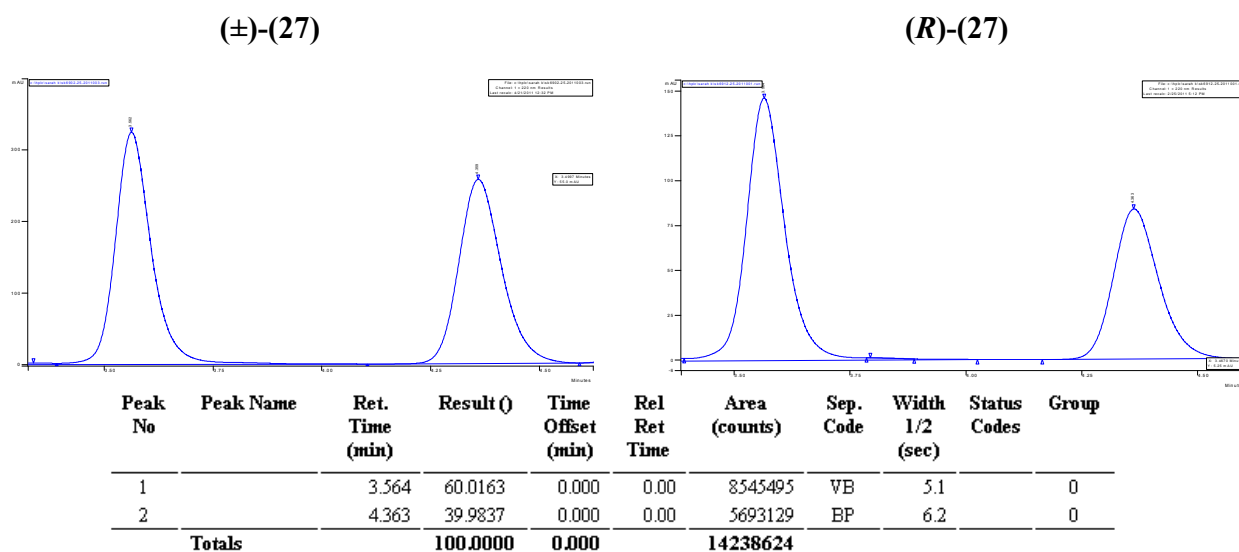

$\delta_{\text{H}}$  (600 MHz, CDCl<sub>3</sub>): 0.85-0.91 (m, 1H), 0.95-1.02 (m, 1H), 1.08-1.21 (m, 4H), 1.25-1.27 (m, 18H), 1.40-1.43 (m, 1H), 1.60-1.70 (m, 4H), 2.09 (d, J 4.6, 1H), 2.55-2.58 (m, 1H), 2.62 (d, J 7.0, 1H), 2.91 (septet, J 6.9, 1H), 4.36 (septet, J 6.7, 2H), 7.17 (s, 2H).

$\delta_{\text{C}}$  (100 MHz, CDCl<sub>3</sub>): 23.72 (2xC), 25.0, 25.1, 25.6, 25.8, 26.2, 29.8 (2xC), 30.0, 31.9, 34.4, 39.3, 44.6, 123.8, 131.6 (q), 151.2 (q), 153.4 (q).

$\nu$  (cm<sup>-1</sup>): 666, 716, 884, 948, 1153, 1312, 1445, 1601, 2863, 2928, 2952, 2965.

HRMS (ESI): [M+H]<sup>+</sup> Calcd. for C<sub>23</sub>H<sub>38</sub>NO<sub>2</sub>S 392.2623; found 392.2630.

## 7.0 Deprotection of aziridine 3c: synthesis of (R)-2-diphenylaziridine for determination of configuration

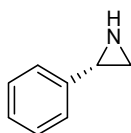

An oven dried 25 cm<sup>3</sup> round bottomed flask containing a magnetic stirring bar was charged with naphthalene (912 mg, 7.112 mmol) and finely chopped sodium (149 mg, 6.465 mmol). The flask was fitted with a rubber

septum and placed under an atmosphere of argon (balloon). Anhydrous THF (6.4 cm<sup>3</sup>) was added *via* syringe. The resulting solution was allowed to stir at ambient temperature for 2 h. An oven dried 25 cm<sup>3</sup> round bottomed flask containing a magnetic stirring bar was then charged with **3c** (124.64 mg, 0.323 mmol), fitted with a rubber septum and placed under an atmosphere of argon (balloon). Anhydrous THF (1.8 cm<sup>3</sup>) was added *via* syringe and the resulting solution was cooled to -78 °C. The sodium naphthalide solution was then added dropwise *via* syringe to the cooled solution and allowed to stir at this temperature for 10 min. The reaction mixture was then quenched by the addition of H<sub>2</sub>O (1 cm<sup>3</sup>). The resulting solution was diluted with Et<sub>2</sub>O (10 cm<sup>3</sup>), poured onto MgSO<sub>4</sub>, filtered and reduced *in vacuo*. Note; due to the volatile nature of the product, the water bath of the rotary evaporator was set at 15 °C. Purification by flash chromatography using 100% hexane initially to remove excess naphthalene, followed by 100% Et<sub>2</sub>O, afforded (*R*)-2-diphenylaziridine as a colourless oil (14.03 mg, 36%). [ $\alpha$ ]<sub>D</sub><sup>20</sup> = -9.5 (c 0.1, Ethanol, 23% *ee*); lit.<sup>15</sup> [ $\alpha$ ]<sub>D</sub><sup>20</sup> = -43.2 (c 1.0, EtOH). The NMR spectra of (*R*)-2-diphenylaziridine were consistent with those previously reported.<sup>16a, 16b</sup>

$\delta_{\text{H}}$  (400 MHz, CDCl<sub>3</sub>): <sup>16a</sup> 1.04 (br s, 1H, NH), 1.84 (br s, 1H), 2.20-2.30 (m, 1H), 3.05 (br s, 1H), 7.25-7.36 (m, 5H, H-Ar).

$\delta_{\text{C}}$  (100 MHz, CDCl<sub>3</sub>): <sup>16b</sup> 29.5, 32.2, 125.8, 127.2, 128.6, 140.6 (q).

HRMS (ESI): [M+H]<sup>+</sup> Calcd. for C<sub>8</sub>H<sub>10</sub>N 120.0813; found 120.0810.

## 8.0 Proposed mechanism for the decomposition of salt (*R,R*)-8 to 9

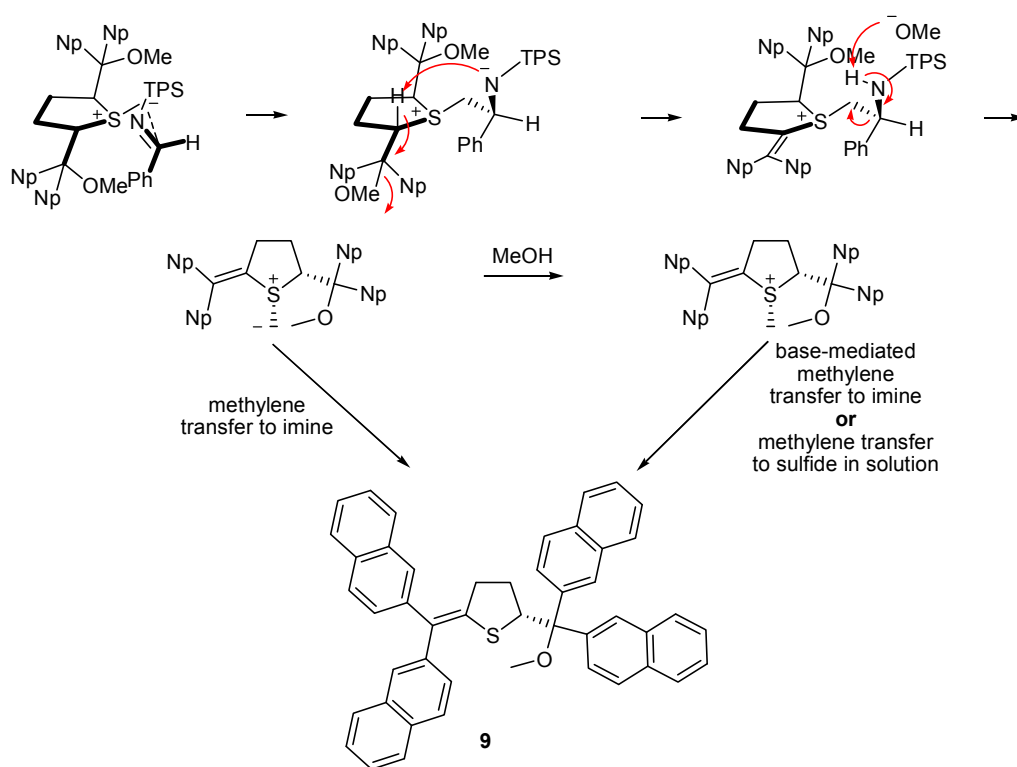

## 9.0 NMR spectra

$^1\text{H}$  NMR spectrum (400 MHz,  $\text{CDCl}_3$ ) of **3c**

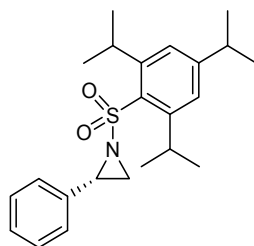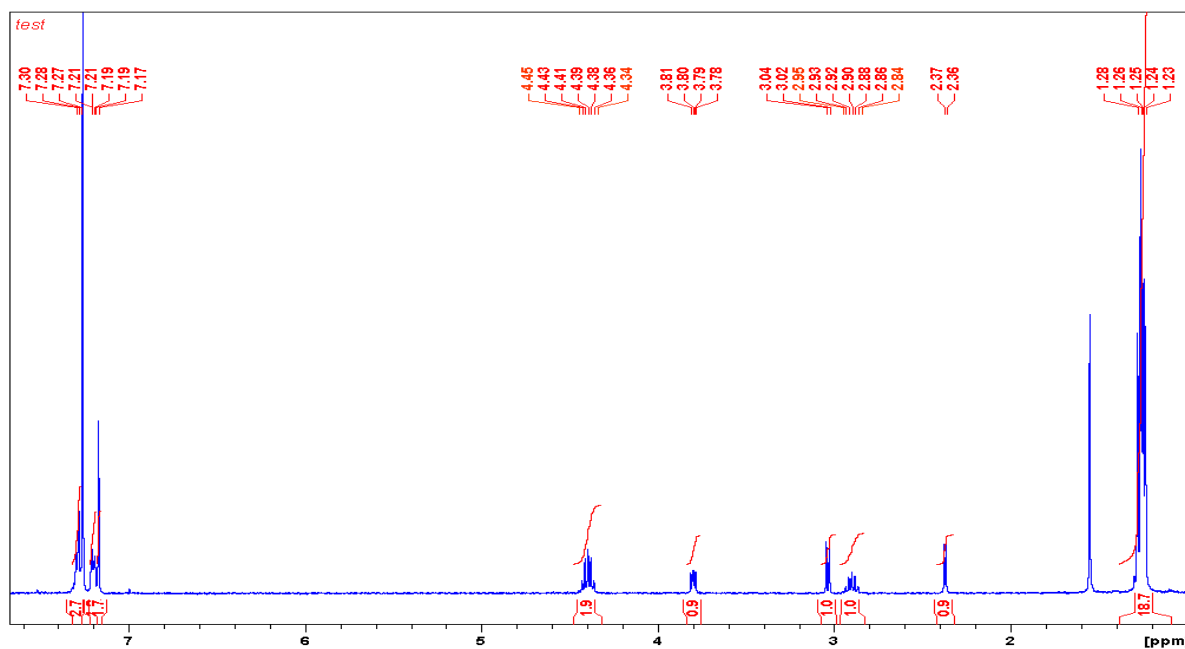

$^{13}\text{C}$  NMR spectrum (100 MHz,  $\text{CDCl}_3$ ) of **3c**

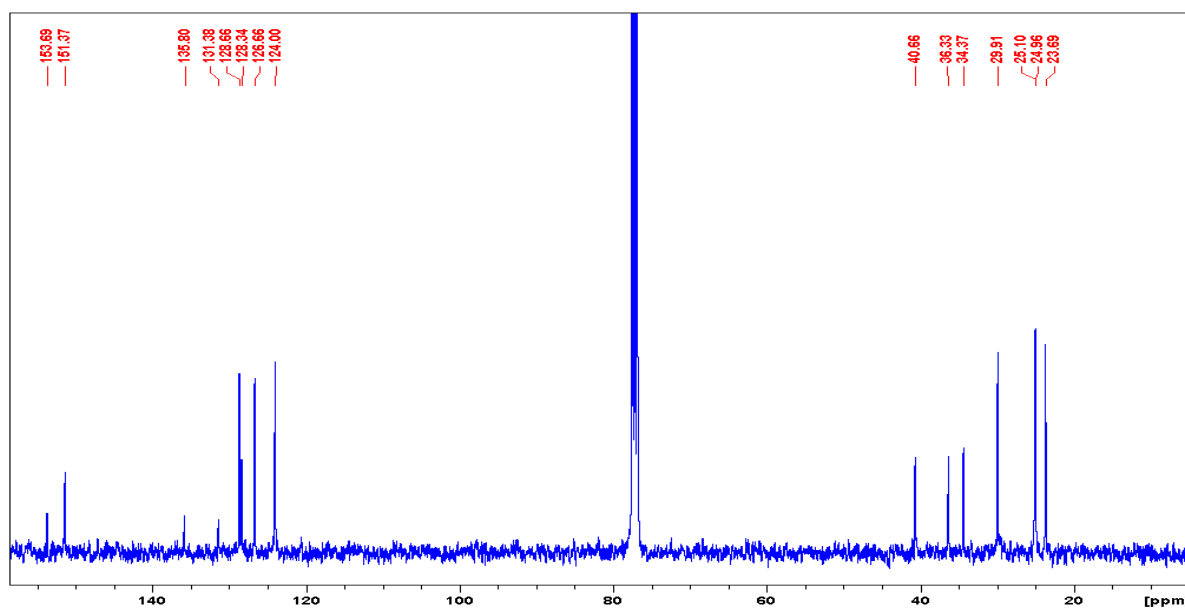

$^1\text{H}$  NMR spectrum (600 MHz,  $\text{CDCl}_3$ ) of **23**

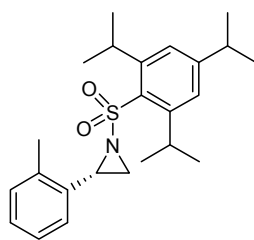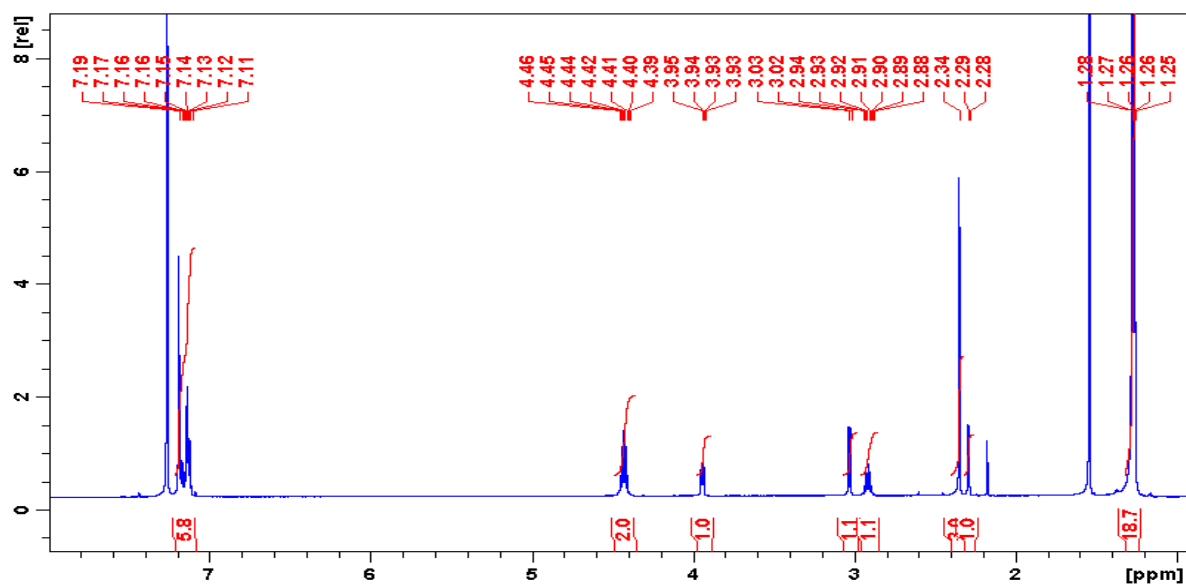

$^{13}\text{C}$  NMR spectrum (150 MHz,  $\text{CDCl}_3$ ) of **23**

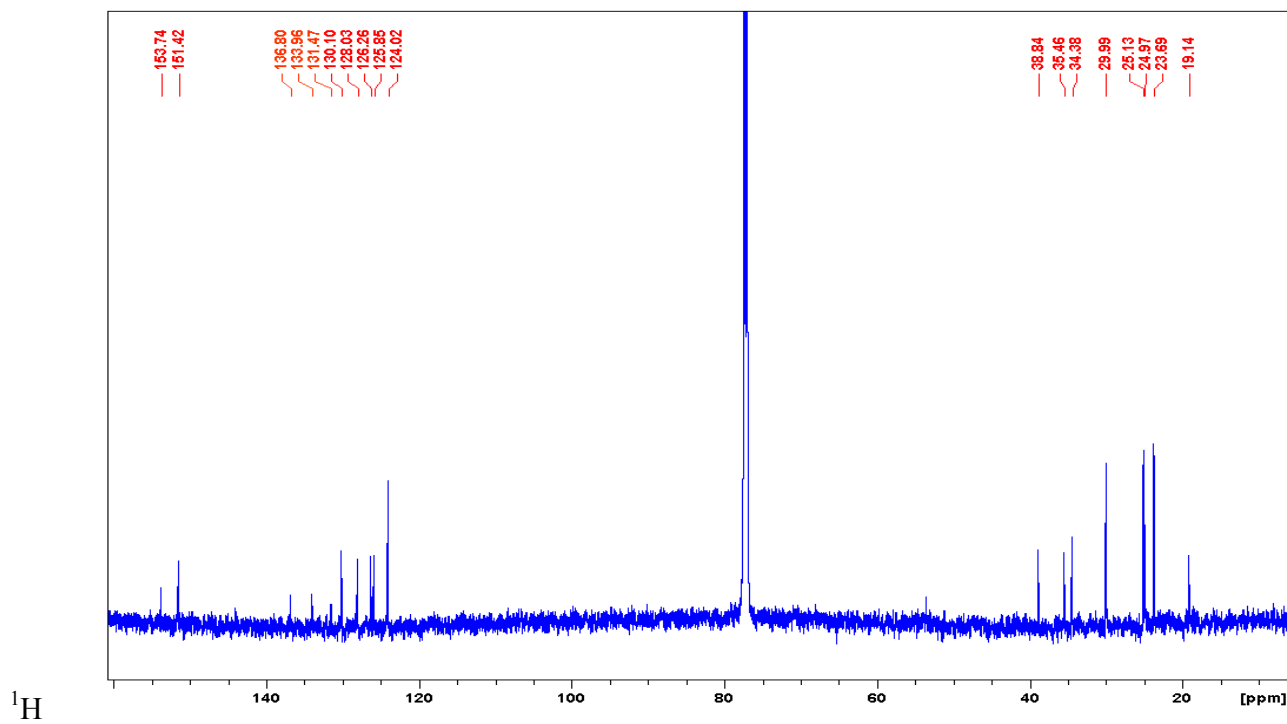

NMR spectrum (600 MHz, CDCl<sub>3</sub>) of **21**

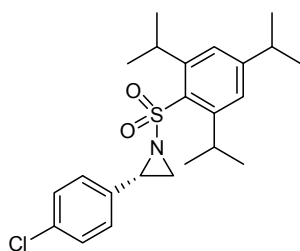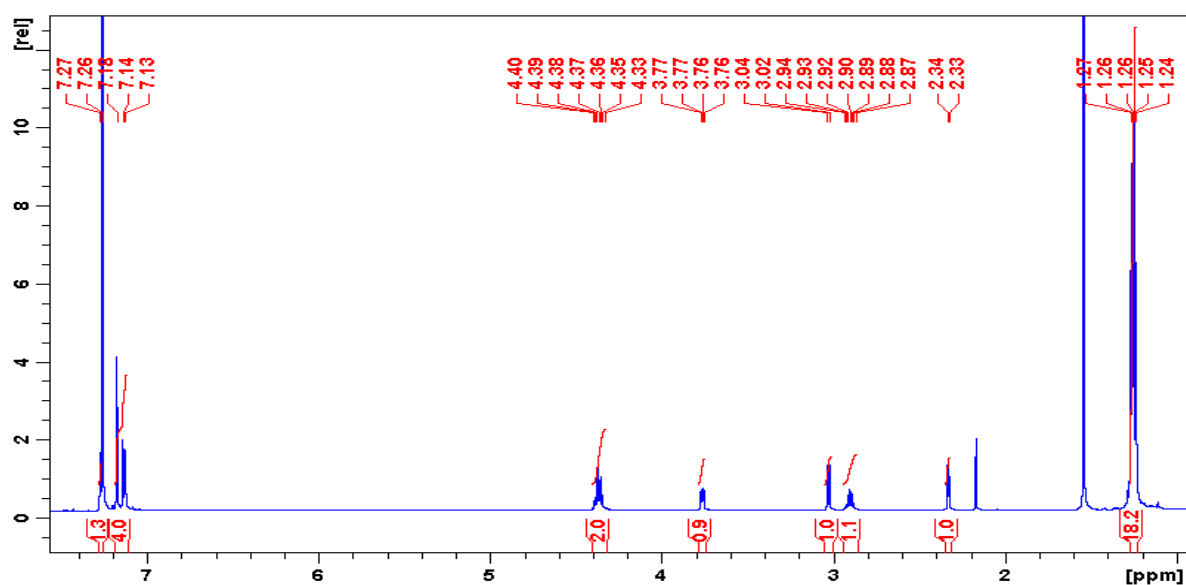

<sup>13</sup>C NMR spectrum (150 MHz, CDCl<sub>3</sub>) of **21**

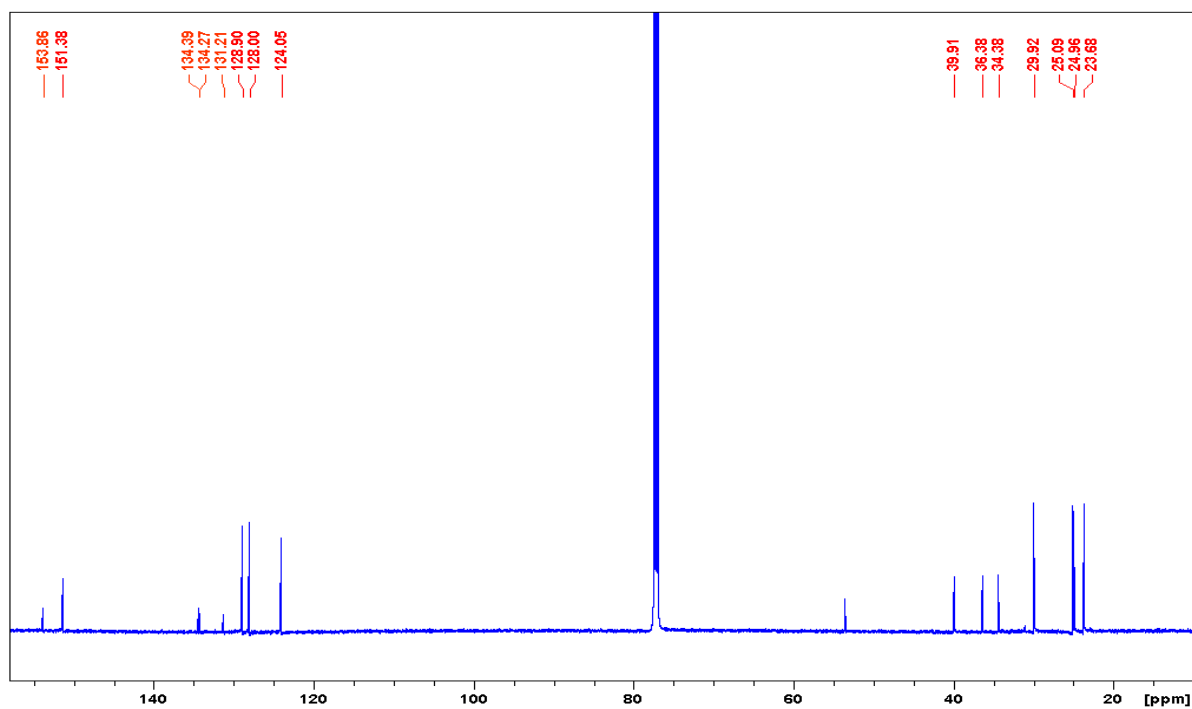

$^1\text{H}$  NMR spectrum (600 MHz,  $\text{CDCl}_3$ ) of **25**

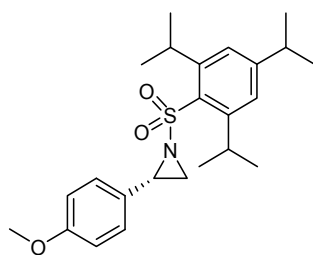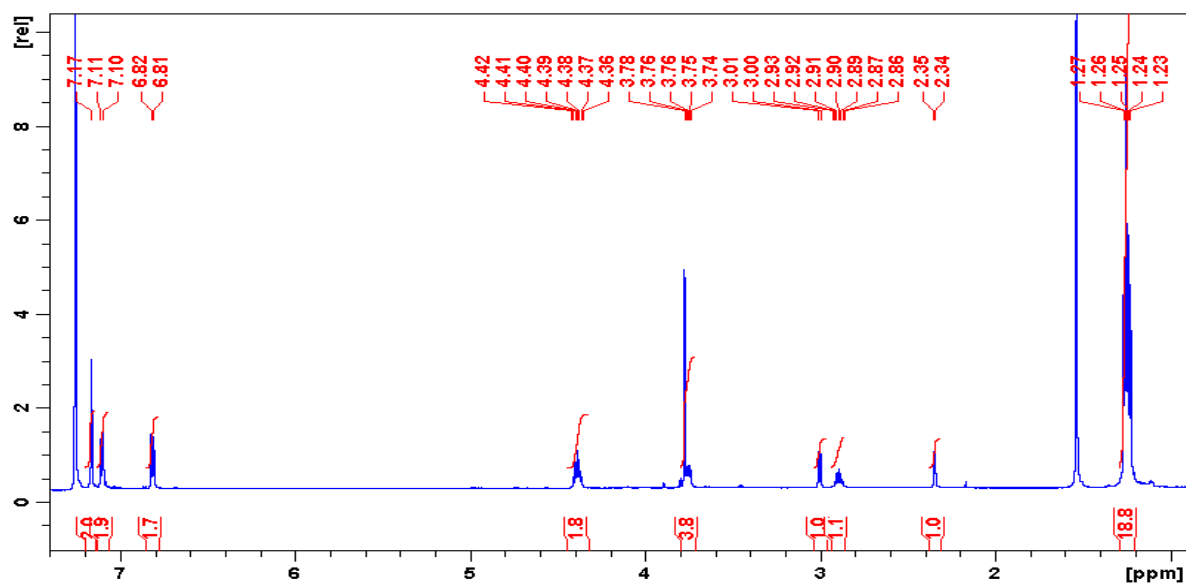

$^{13}\text{C}$  NMR spectrum (150 MHz,  $\text{CDCl}_3$ ) of **25**

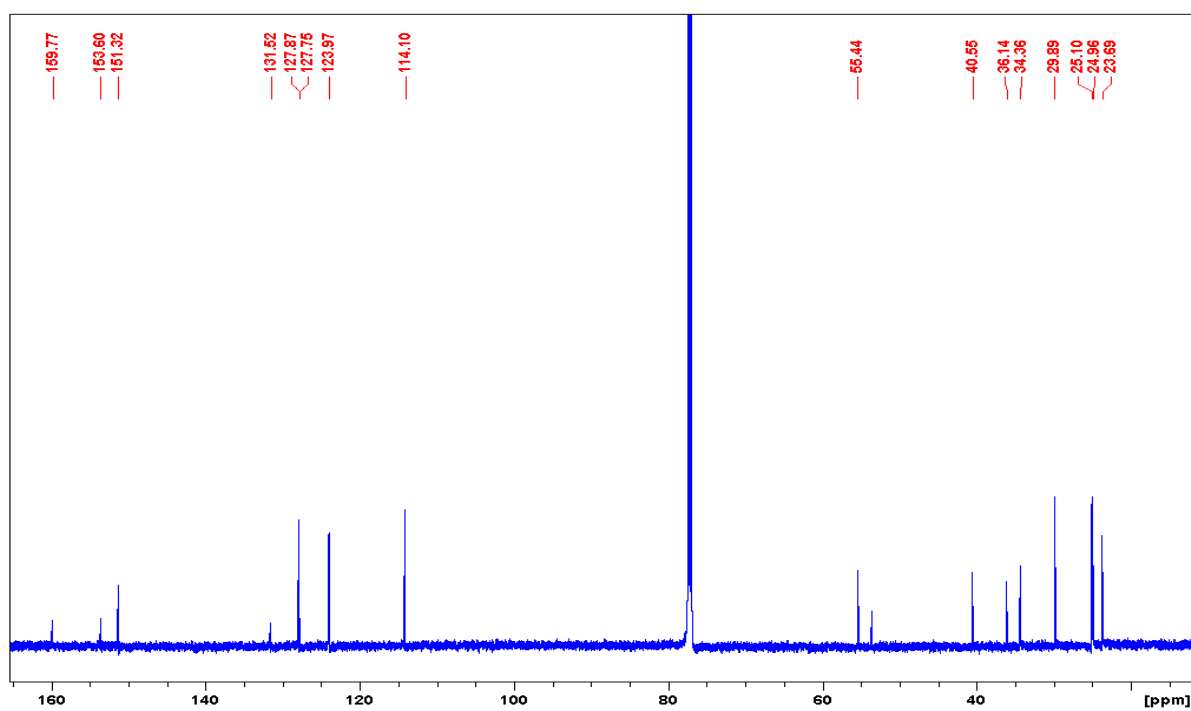

$^1\text{H}$  NMR spectrum (600 MHz,  $\text{CDCl}_3$ ) of **22**

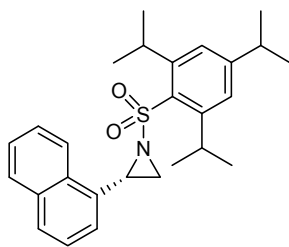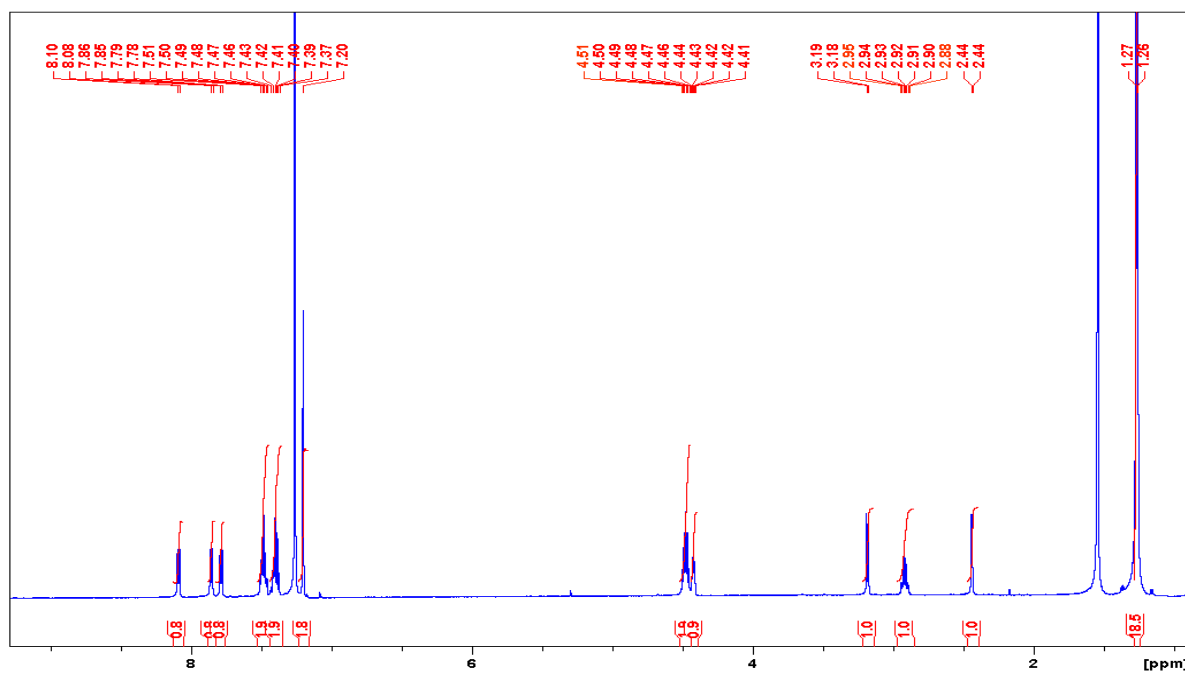

$^{13}\text{C}$  NMR spectrum (100 MHz,  $\text{CDCl}_3$ ) of **22**

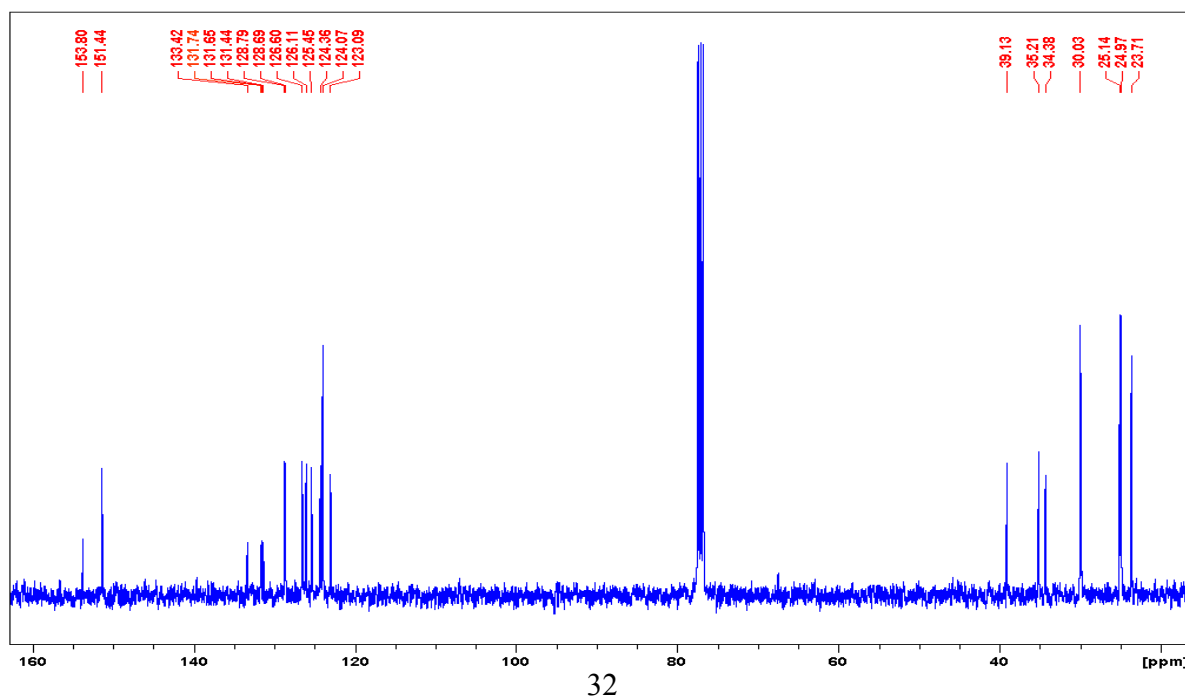



$^1\text{H}$  NMR spectrum (400 MHz,  $\text{CDCl}_3$ ) of **26**

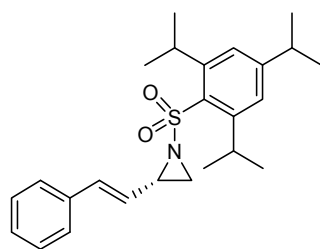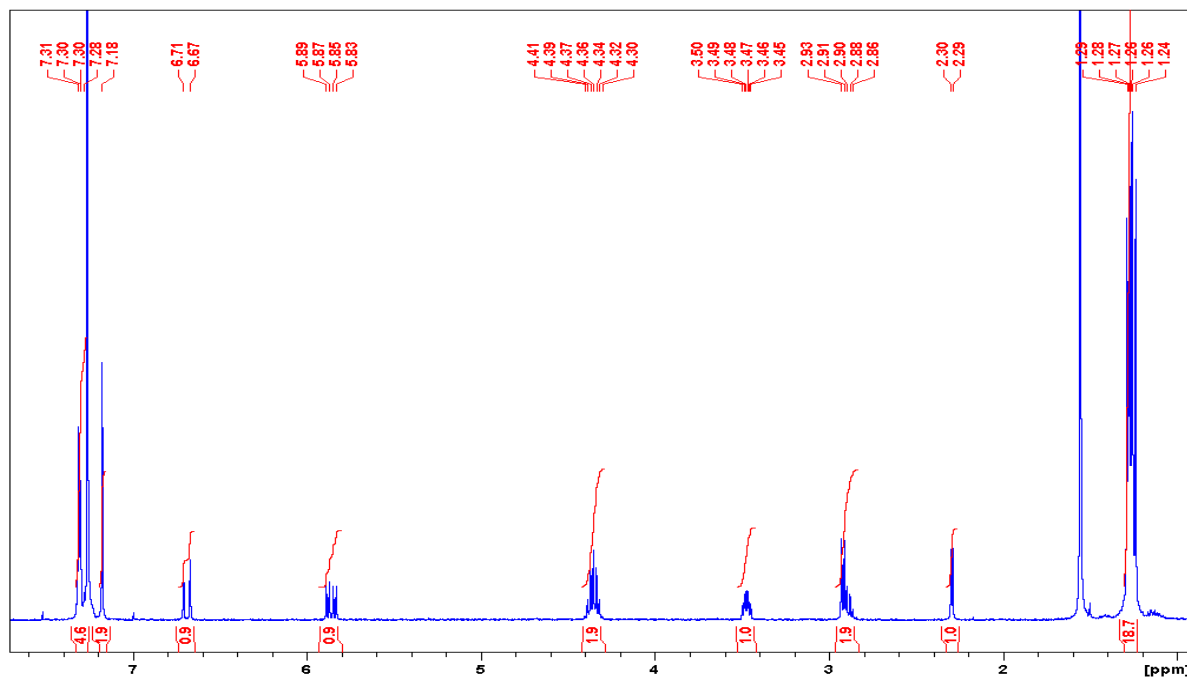

$^{13}\text{C}$  NMR spectrum (100 MHz,  $\text{CDCl}_3$ ) of **26**

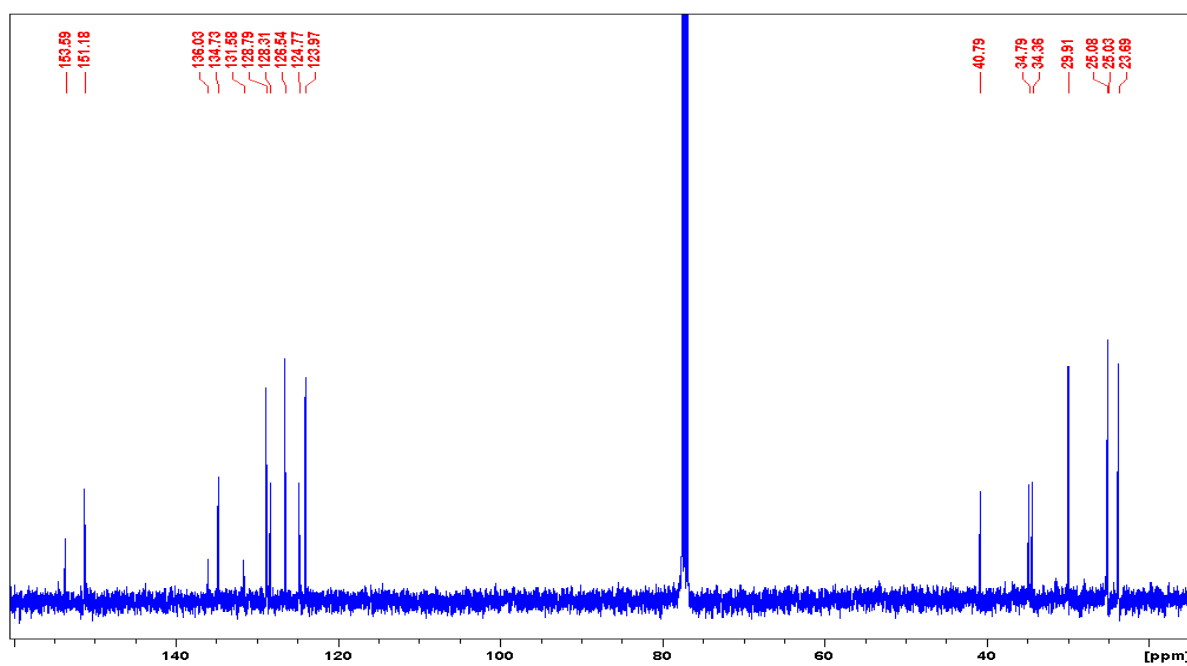

$^1\text{H}$  NMR spectrum (600 MHz,  $\text{CDCl}_3$ ) of **24**

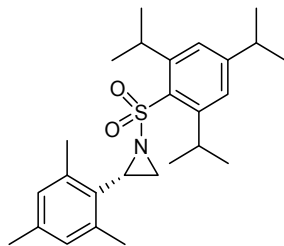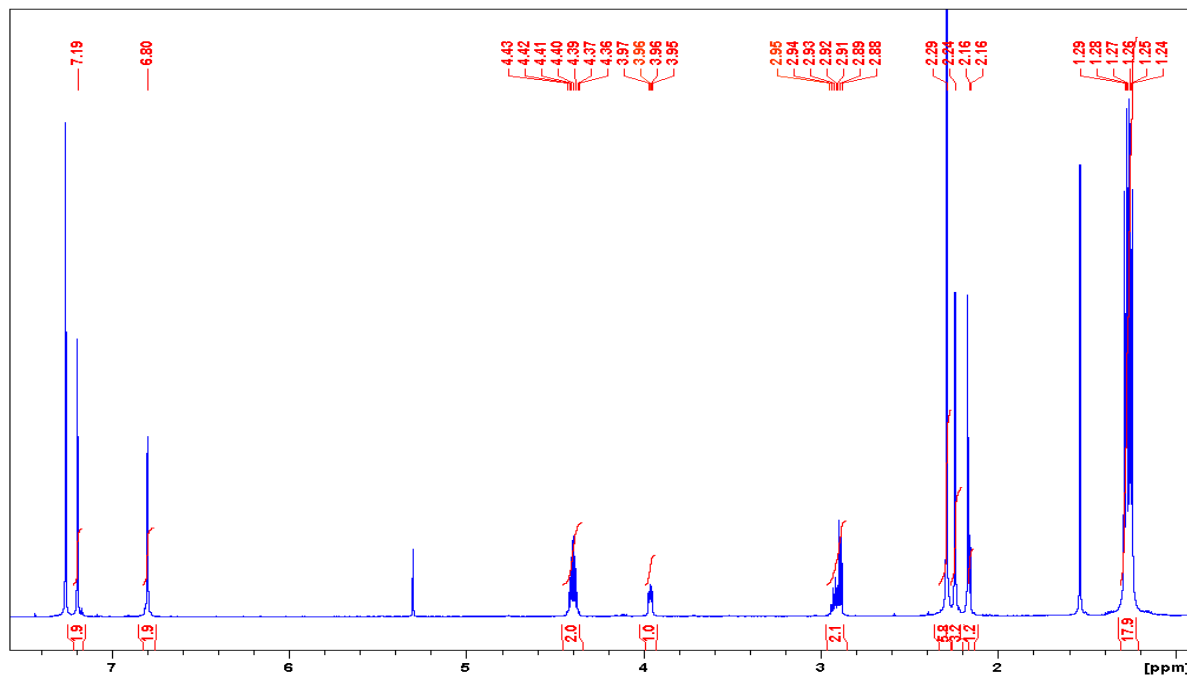

$^{13}\text{C}$  NMR spectrum (100 MHz,  $\text{CDCl}_3$ ) of **24**

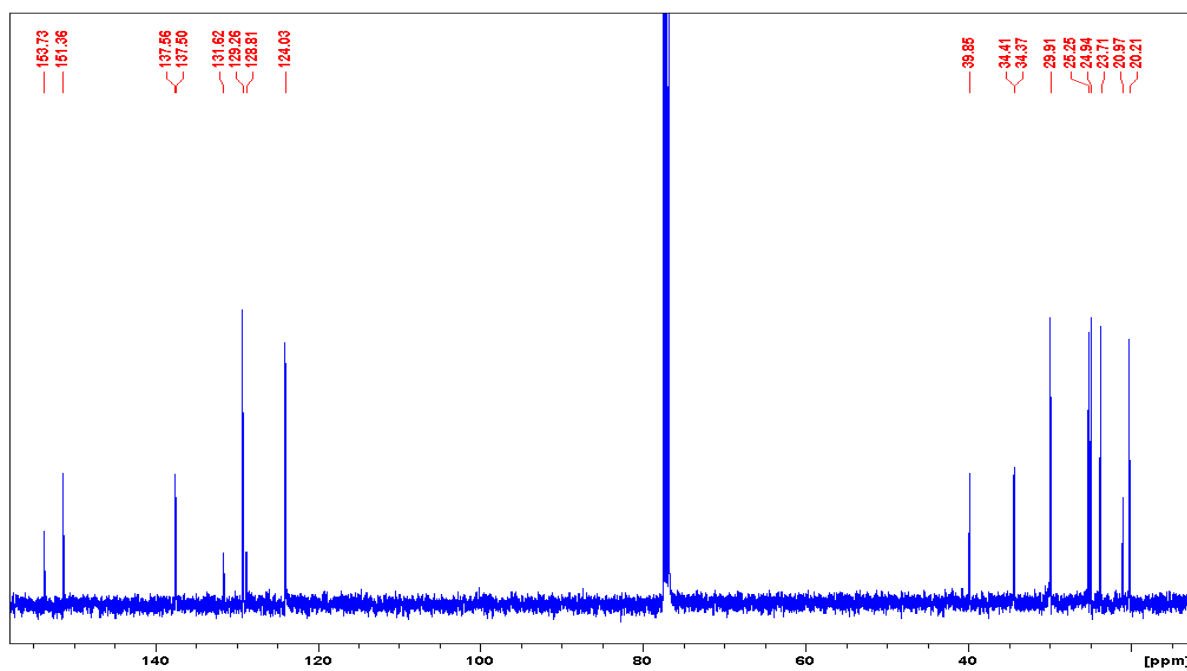

$^1\text{H}$  NMR spectrum (600 MHz,  $\text{CDCl}_3$ ) of **27**

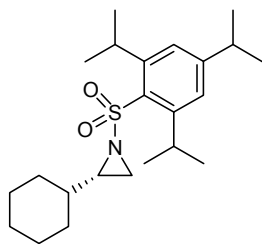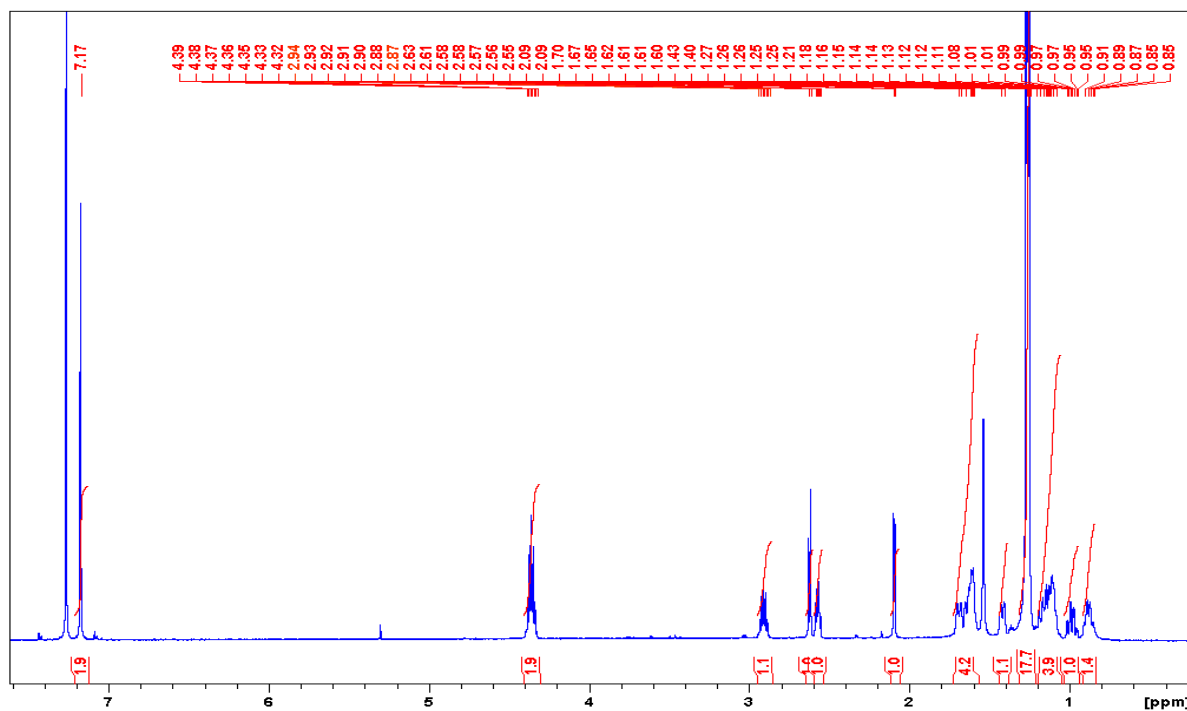

$^1\text{H}$  NMR spectrum (400 MHz,  $\text{CDCl}_3$ ) of (*R*)-2-diphenylaziridine

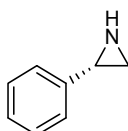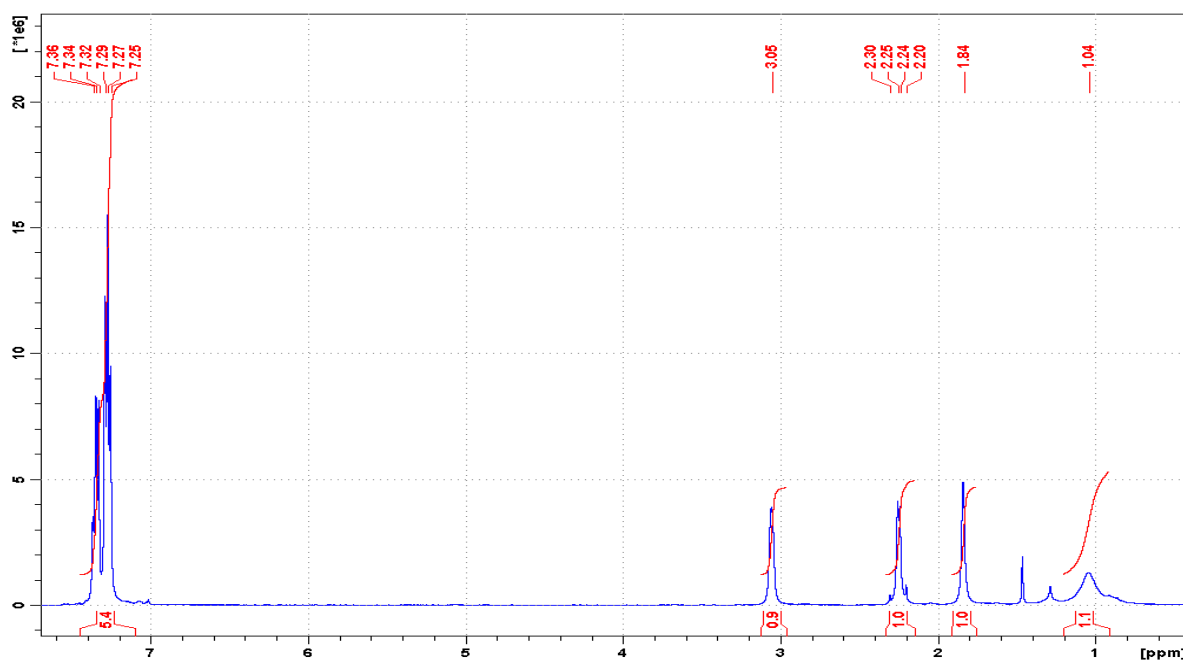

$^{13}\text{C}$  NMR spectrum (100 MHz,  $\text{CDCl}_3$ ) of (*R*)-2-diphenylaziridine

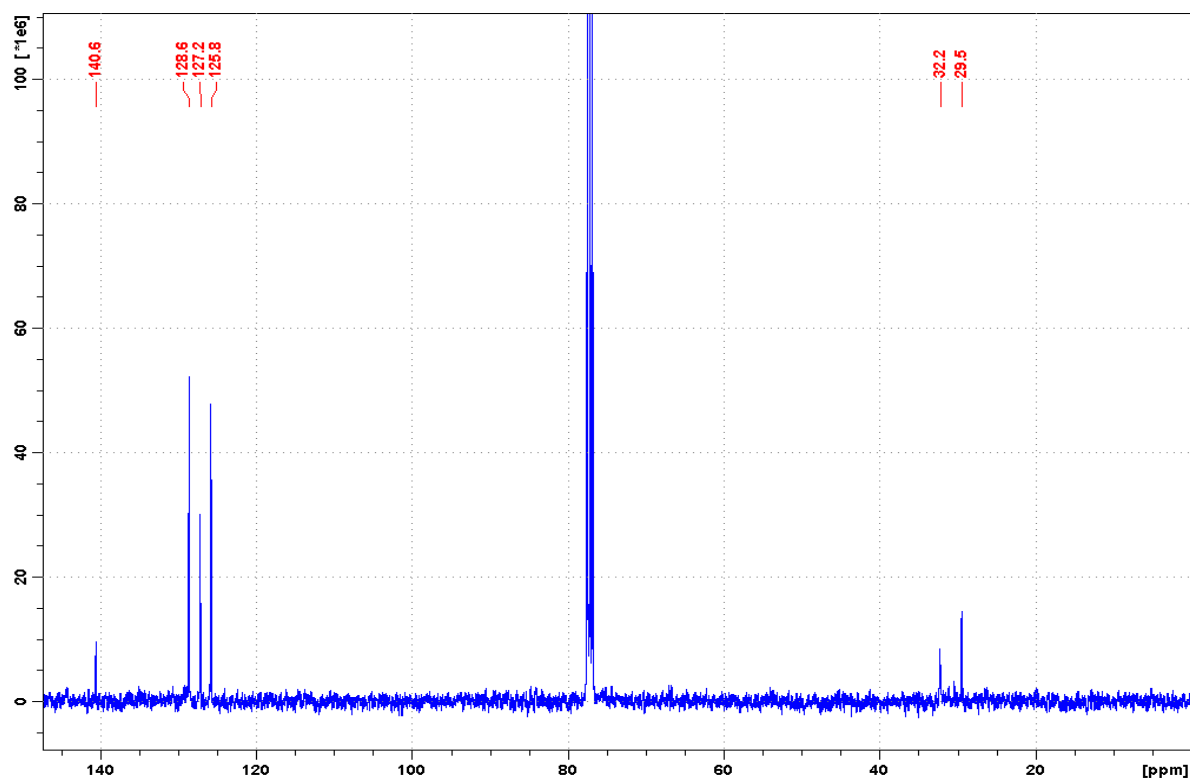

## 10.0 References

1. A. Piccinini, S. A. Kavanagh, P. B. Connon and S. J. Connon, *Org. Lett.*, 2010, **12**, 608.
2. R. E. Grote and E. R. Jarvo, *Org. Lett.*, 2009, **11**, 485.
3. C. Palomo, M. Oiarbide, R. Halder, A. Laso and R. López, *Angew. Chem., Int. Ed.*, 2006, **45**, 117.
4. W. B. Jennings and C. J. Lovely, *Tetrahedron*, 1991, **47**, 5561.
5. R. I. Kureshy, K. J. Prathap, S. Agarwal, N. H. Khan, S. H. R. Abdi and R. V. Jasra, *Eur. J. Org. Chem.*, 2008, 3118.
6. D. E. Pearson, D. Caine and L. Field, *J. Org. Chem.*, 1960, **25**, 867.
7. T. Hayashi, M. Kawai and N. Tokunaga, *Angew. Chem., Int. Ed.*, 2004, **43**, 6125.
8. S. Nakamura, H. Nakashima, H. Sugimoto, H. Sano, M. Hattori, N. Shibata and T. Toru, *Chem.-Eur. J.*, 2008, **14**, 2145.
9. T. Soeta, M. Kuriyama and K. Tomioka, *J. Org. Chem.*, 2005, **70**, 297.
10. A. V. Malkov, S. Stončius and P. Kočovský, *Angew. Chem., Int. Ed.*, 2007, **46**, 3722.
11. W. Chamchaang and A. R. Pinhas, *J. Org. Chem.*, 1990, **55**, 2943.
12. S. Fantauzzi, E. Gallo, A. Caselli, C. Piangiolo, F. Ragaini and S. Cenini, *Eur. J. Org. Chem.*, 2007, 6053.

13. D. A. Alonso and P. G. Andersson, *J. Org. Chem.*, 1998, **63**, 9455.
14. A. A. Cantrill, H. M. I. Osborn and J. Sweeney, *Tetrahedron*, 1998, **54**, 2181.
15. J. Xu, *Tetrahedron: Asymmetry*, 2002, **13**, 1129.
16. (a) Y. Du, Y. Wu, A.-H. Liu and L.-N. He, *J. Org. Chem.*, 2008, **73**, 4709; (b) H. Lebel, S. Lectard and M. Parmentier, *Org. Lett.*, 2007, **9**, 4797.
